# Supplementary material for: Growth Kinetics, Carbon Isotope Fractionation, and Gene Expression in the Hyperthermophile Methanocaldococcus jannaschii during Hydrogen-Limited Growth and Interspecies Hydrogen Transfer
Source: PubMed Central journal article supplement (PMC6495749; doi:10.1128/aem.00180-19), 2019-04-18
Supplement: AEM.00180-19-s0001.pdf [file AEM.00180-19-s0001.pdf]

1  
2  
3  
4  
5  
6  
7  
8  
9  
10  
11  
12  
13  
14  
15  
16  
17  
18  
19  
20  
21  
22  
23  
24  
25  
26  
27  
28  
29  
30  
31  
32  
33  
34  
35  
36

## Supplemental Material for

### **Growth Kinetics, Carbon Isotope Fractionation and Gene Expression in the Hyperthermophile *Methanocaldococcus jannaschii* during H<sub>2</sub>-Limited Growth and Interspecies H<sub>2</sub> Transfer**

Begüm D. Topçuoğlu<sup>a\*</sup>, Cem Meydan<sup>b</sup>, Tran B. Nguyen<sup>c</sup>, Susan Q. Lang<sup>c</sup>, and James F. Holden<sup>a#</sup>

<sup>a</sup>*Department of Microbiology, University of Massachusetts, Amherst, Massachusetts, USA.*

<sup>b</sup>*Institute for Computational Biomedicine, Weill Cornell Medical College, New York, New York, USA*

<sup>c</sup>*School of the Earth, Ocean, and Environment, University of South Carolina, Columbia, South Carolina, USA*

#Address correspondence to James F. Holden, [jholden@microbio.umass.edu](mailto:jholden@microbio.umass.edu)

\*Present address: Begüm D. Topçuoğlu, Department of Microbiology & Immunology, University of Michigan, Ann Arbor, Michigan.

This file includes:

Figures S1 through S6

Tables S1 through S5

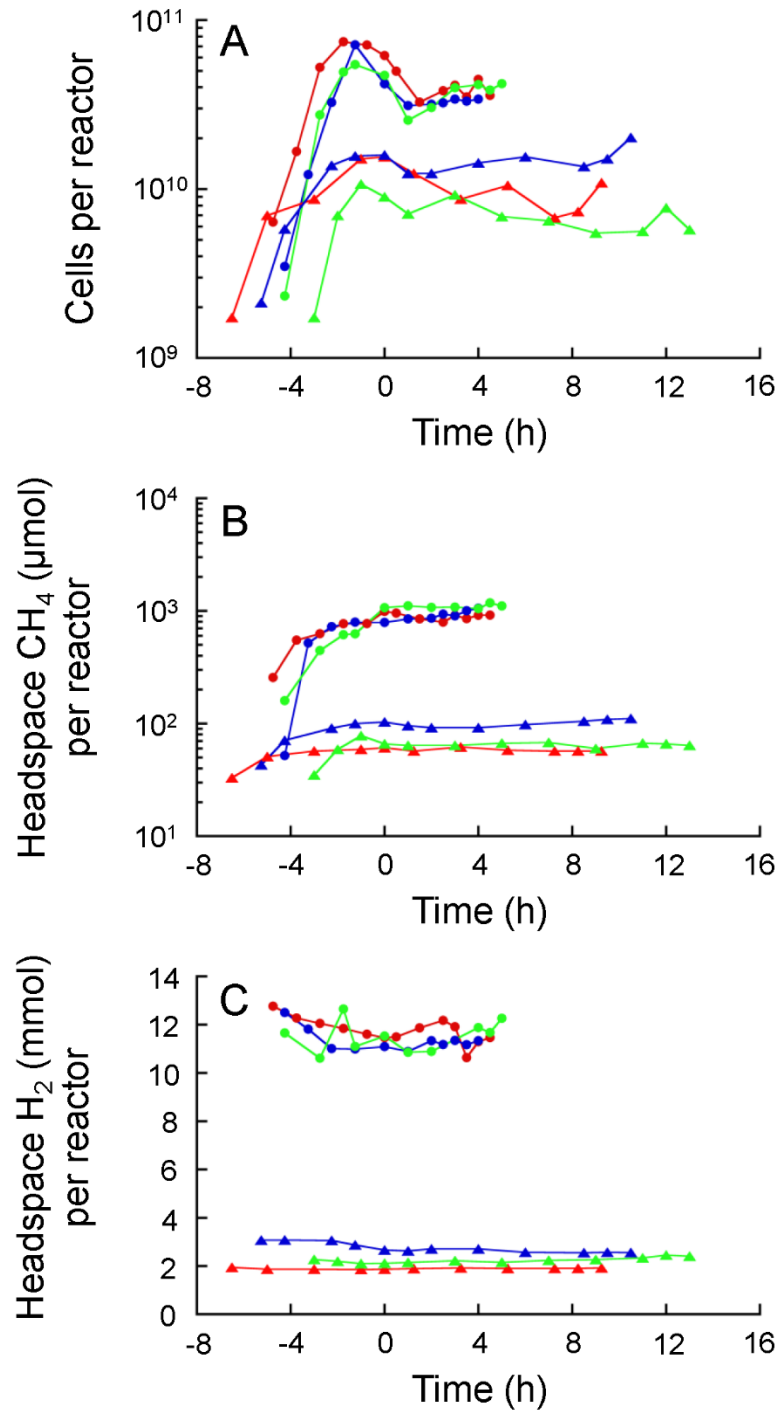

37

38 **Figure S1** Total number of cells in the medium (a) and total amount of CH<sub>4</sub> (b) and H<sub>2</sub>  
 39 (c) in the reactor headspace for *M. jannaschii* grown in the chemostat at 80-83 µM H<sub>2</sub>  
 40 (●, ●, ●) and 15-27 µM H<sub>2</sub> (▲, ▲, ▲). Time zero indicates the point where the reactor  
 41 was shifted from batch growth to chemostat growth.

42

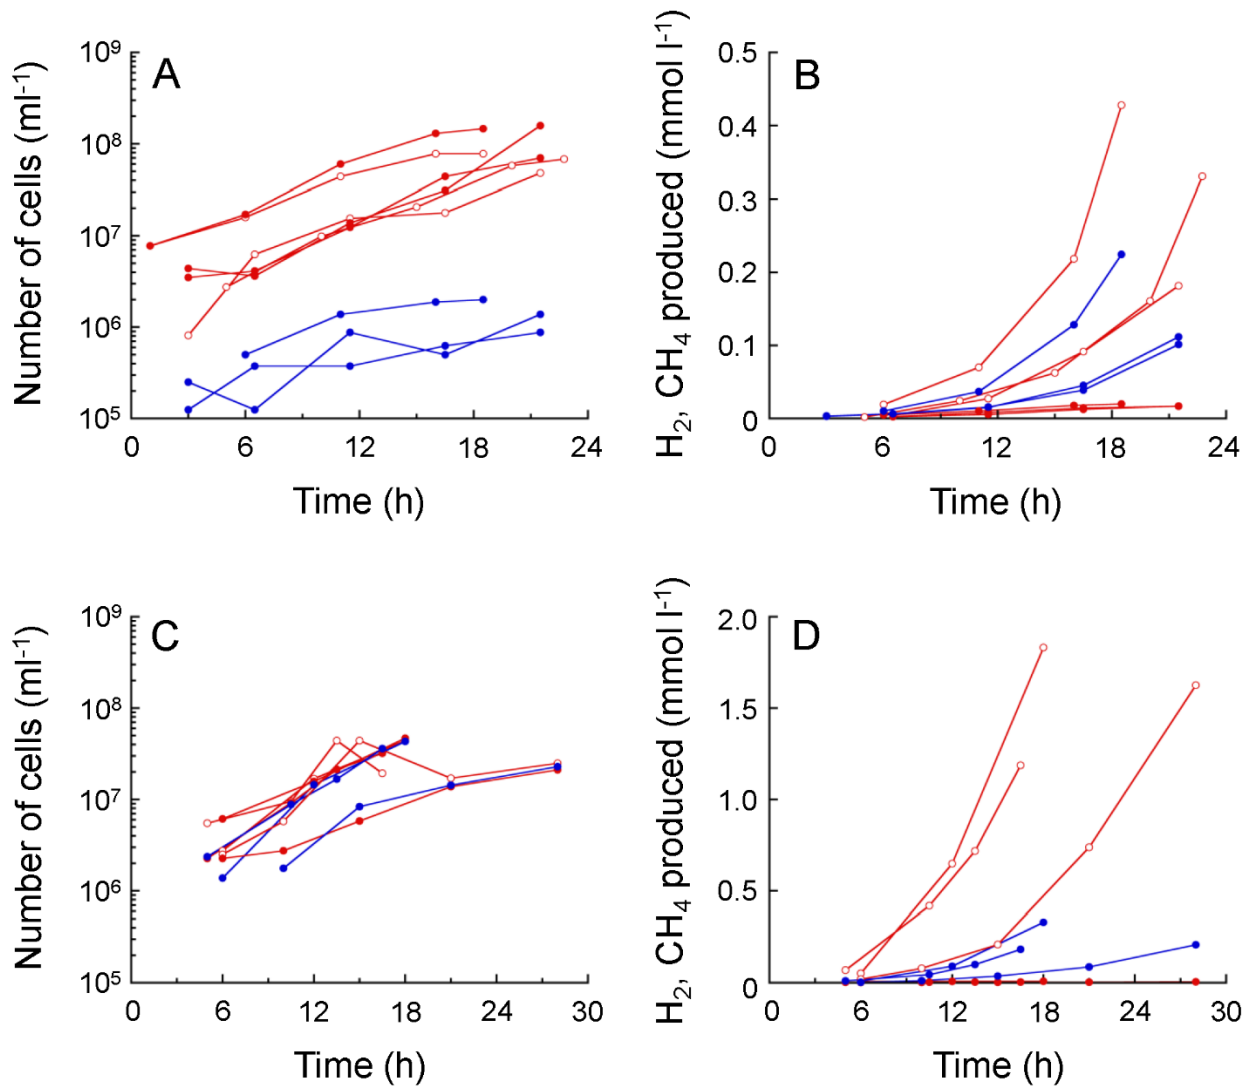

43

44 **Figure S2** Cell concentrations and H<sub>2</sub> and CH<sub>4</sub> produced per liter of growth medium  
 45 when cultures were grown in bottles on maltose (a, b) and formate (c, d). Symbols: (○)  
 46 cell concentration of *T. paralvinellae* (a, c) and H<sub>2</sub> produced (b, d) when *T. paralvinellae*  
 47 was grown in monoculture, (●) cell concentration of *T. paralvinellae* (a, c) and H<sub>2</sub>  
 48 produced (b, d) when *T. paralvinellae* and *M. jannaschii* were grown in co-culture, (●)  
 49 cell concentration of *M. jannaschii* (a, c) and CH<sub>4</sub> produced (b, d) when *T. paralvinellae*  
 50 and *M. jannaschii* were grown in co-culture.

51

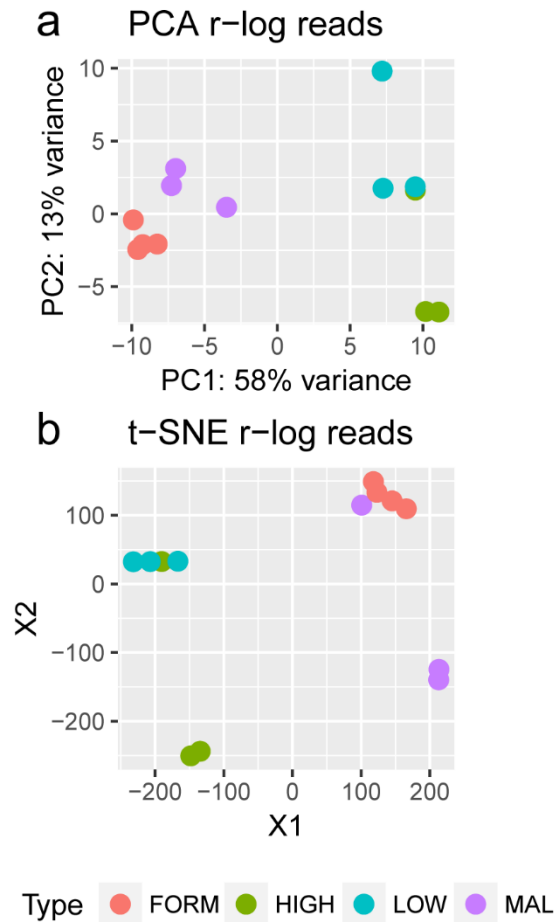

53

54 **Figure S3** (a) Principal component analysis (PCA) (b) t-Distributed Stochastic Neighbor  
 55 Embedding Analysis (t-SNE). Red and purple represent co-cultures on formate and  
 56 maltose, respectively. Blue and green represent chemostat monocultures with 15-27  $\mu\text{M}$   
 57  $\text{H}_2$  and 80-83  $\mu\text{M}$   $\text{H}_2$  conditions, respectively.

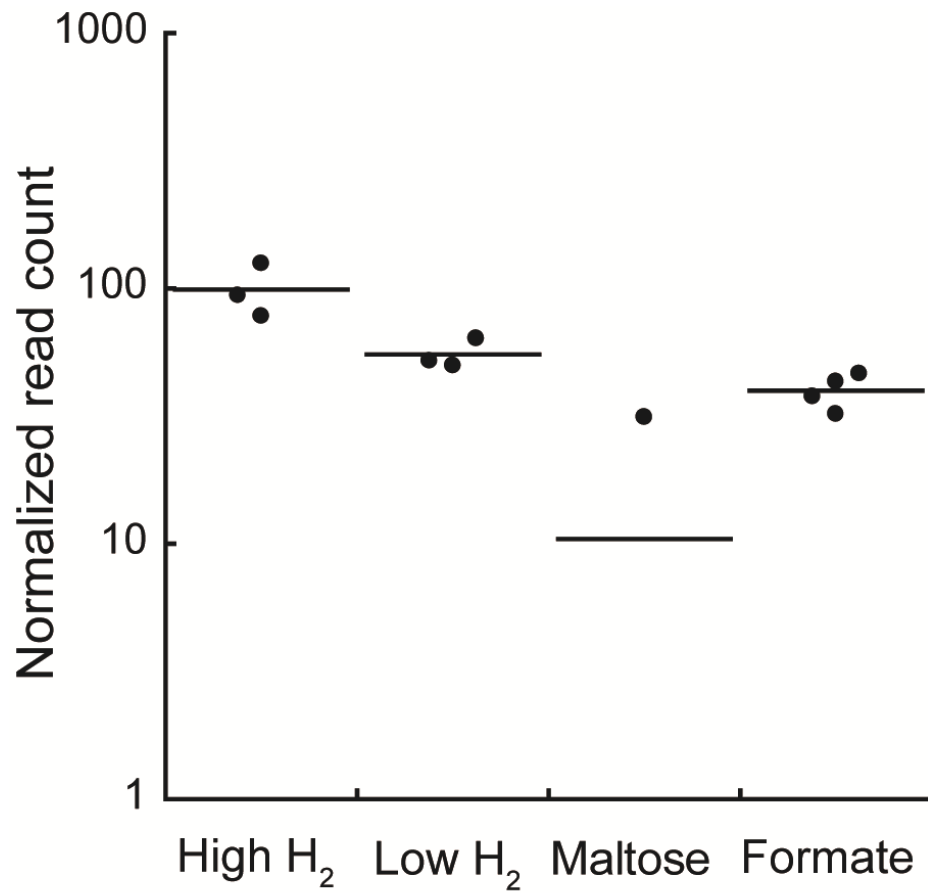

58

59 **Figure S4** *M. jannaschii* transcript levels (relative log expression (RLE)-normalization)  
 60 for H<sub>2</sub>-dependent methylene-H<sub>4</sub>MPT (*hmdX*, MJ\_RS03820) for each growth condition.

61

62

63

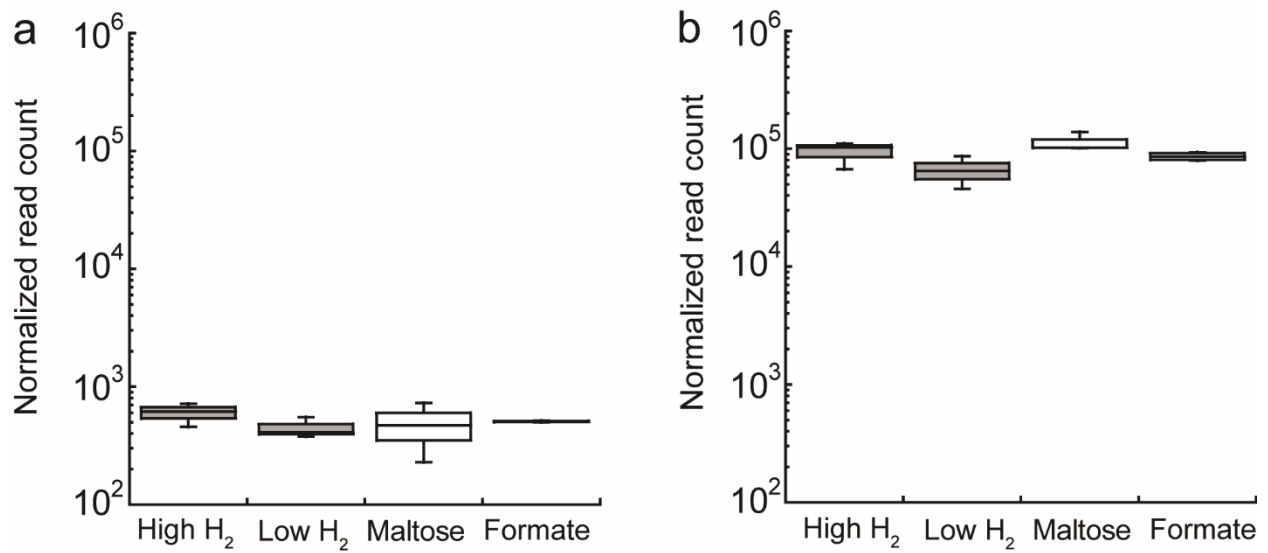

64

65 **Figure S5** *M. jannaschii* transcript levels (relative log expression (RLE)-normalization)  
66 for (a) methyl-CoA reductase I subunit A (*mcrA*, MJ\_RS00415) (b) methyl-CoA  
67 reductase II subunit A (*mcrA*, MJ\_RS04540) for each growth condition.

68

69

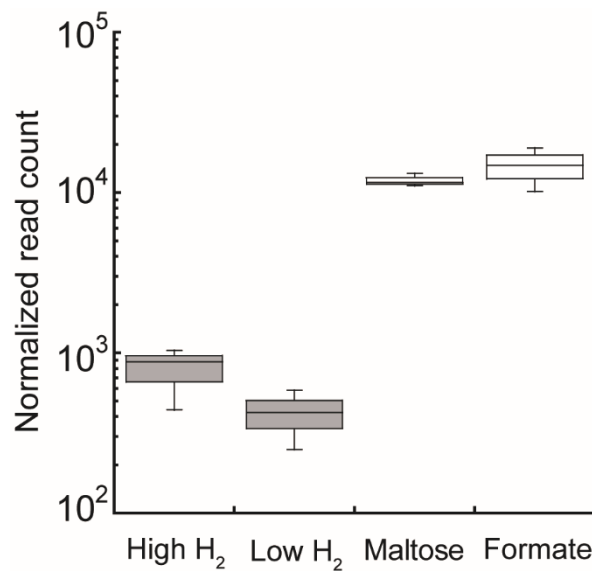

70

71 **Figure S6** *M. jannaschii* transcript levels (relative log expression (RLE)-normalization)  
72 for MJ\_RS03480, a hypothetical protein with a predicted RNA-binding domain.

73

**Table S1. Chemostat data for *Methanocaldococcus jannaschii***

| [H <sub>2</sub> ]<br>( $\mu\text{M}$ ) | D<br>( $\text{h}^{-1}$ ) | Dilution<br>rate<br>( $\text{ml min}^{-1}$ ) | [Cell]<br>( $\text{ml}^{-1}$ ) | Cell prod.<br>rate<br>( $\text{cells h}^{-1}$ ) | Liquid [CH <sub>4</sub> ]<br>( $\text{nmol ml}^{-1}$ ) | Headspace<br>[CH <sub>4</sub> ]<br>( $\mu\text{mol ml}^{-1}$ ) | CH <sub>4</sub> prod.<br>rate<br>( $\text{mmol h}^{-1}$ ) | Specific CH <sub>4</sub><br>prod. rate<br>( $\text{fmol cell}^{-1} \text{h}^{-1}$ ) | Cell yield<br>( $\text{cells} \times 10^{12}$<br>$\text{mol CH}_4^{-1}$ ) |
|----------------------------------------|--------------------------|----------------------------------------------|--------------------------------|-------------------------------------------------|--------------------------------------------------------|----------------------------------------------------------------|-----------------------------------------------------------|-------------------------------------------------------------------------------------|---------------------------------------------------------------------------|
| 80                                     | 0.8                      | 20                                           | $2.26 \times 10^7$             | $2.72 \times 10^{10}$                           | 30.2                                                   | 1.899                                                          | 15.87                                                     | 453.0                                                                               | 1.71                                                                      |
| 80                                     | 0.8                      | 20                                           | $2.88 \times 10^7$             | $3.46 \times 10^{10}$                           | 30.2                                                   | 2.036                                                          | 17.02                                                     | 381.2                                                                               | 2.03                                                                      |
| 80                                     | 0.8                      | 20                                           | $2.31 \times 10^7$             | $2.77 \times 10^{10}$                           | 30.2                                                   | 2.040                                                          | 17.05                                                     | 476.2                                                                               | 1.62                                                                      |
| 80                                     | 0.8                      | 20                                           | $2.20 \times 10^7$             | $2.64 \times 10^{10}$                           | 44.1                                                   | 2.009                                                          | 16.81                                                     | 492.9                                                                               | 1.57                                                                      |
| 80                                     | 0.8                      | 20                                           | $2.14 \times 10^7$             | $2.57 \times 10^{10}$                           | 44.1                                                   | 2.231                                                          | 18.66                                                     | 562.5                                                                               | 1.38                                                                      |
| 80                                     | 0.8                      | 20                                           | $2.20 \times 10^7$             | $2.64 \times 10^{10}$                           | 44.1                                                   | 2.342                                                          | 19.59                                                     | 574.3                                                                               | 1.35                                                                      |
| 83                                     | 0.68                     | 17                                           | $2.68 \times 10^7$             | $2.73 \times 10^{10}$                           | 34.3                                                   | 2.329                                                          | 19.46                                                     | 468.4                                                                               | 1.40                                                                      |
| 83                                     | 0.68                     | 17                                           | $2.49 \times 10^7$             | $2.54 \times 10^{10}$                           | 34.3                                                   | 2.624                                                          | 21.92                                                     | 567.9                                                                               | 1.16                                                                      |
| 83                                     | 0.68                     | 17                                           | $2.71 \times 10^7$             | $2.77 \times 10^{10}$                           | 34.3                                                   | 2.454                                                          | 20.50                                                     | 488.1                                                                               | 1.35                                                                      |
| 17                                     | 0.34                     | 8.6                                          | $4.38 \times 10^6$             | $2.26 \times 10^9$                              | 3.2                                                    | 0.128                                                          | 1.1                                                       | 166.5                                                                               | 2.05                                                                      |
| 17                                     | 0.34                     | 8.6                                          | $4.75 \times 10^6$             | $2.45 \times 10^9$                              | 3.2                                                    | 0.128                                                          | 1.1                                                       | 153.6                                                                               | 2.23                                                                      |
| 17                                     | 0.34                     | 8.6                                          | $7.00 \times 10^6$             | $3.61 \times 10^9$                              | 3.2                                                    | 0.127                                                          | 1.1                                                       | 103.3                                                                               | 3.28                                                                      |
| 22                                     | 0.28                     | 7.0                                          | $8.75 \times 10^6$             | $3.68 \times 10^9$                              | 0.1                                                    | 0.234                                                          | 2.1                                                       | 155.3                                                                               | 1.75                                                                      |
| 22                                     | 0.28                     | 7.0                                          | $9.75 \times 10^6$             | $4.10 \times 10^9$                              | 0.1                                                    | 0.243                                                          | 2.2                                                       | 144.7                                                                               | 1.86                                                                      |
| 22                                     | 0.28                     | 7.0                                          | $1.30 \times 10^7$             | $5.46 \times 10^9$                              | 0.1                                                    | 0.248                                                          | 2.2                                                       | 110.8                                                                               | 2.48                                                                      |
| 28                                     | 0.25                     | 6.3                                          | $5.63 \times 10^6$             | $2.13 \times 10^9$                              | 5.5                                                    | 0.151                                                          | 1.4                                                       | 156.0                                                                               | 1.52                                                                      |
| 28                                     | 0.25                     | 6.3                                          | $7.75 \times 10^6$             | $2.93 \times 10^9$                              | 5.5                                                    | 0.147                                                          | 1.3                                                       | 110.3                                                                               | 2.25                                                                      |
| 28                                     | 0.25                     | 6.3                                          | $5.75 \times 10^6$             | $2.17 \times 10^9$                              | 5.5                                                    | 0.144                                                          | 1.3                                                       | 145.6                                                                               | 1.67                                                                      |

$$D = (\text{Dilution rate} \times 60) \div 1,550 \text{ ml}$$

$$\text{Cell production rate} = \text{Dilution rate} \times [\text{Cell}] \times 60$$

$$\text{CH}_4 \text{ production rate} = ((\text{Liquid [CH}_4\text{]} \times \text{Dilution rate}) + (\text{Headspace [CH}_4\text{]} \times \text{Gas flow rate})) \times 60$$

$$\text{Cell-specific CH}_4 \text{ production rate (} q \text{)} = \text{CH}_4 \text{ production rate} \div ([\text{Cell}] \times 1,500 \text{ ml})$$

$$\text{Cell yield (} Y_{\text{CH}_4} \text{)} = \text{Cell production rate} \div \text{CH}_4 \text{ production rate}$$

**Table S2. Co-culture growth and CH<sub>4</sub> production kinetic data for *Methanocaldococcus jannaschii***

| Growth condition | Growth rate ( $k$ , h <sup>-1</sup> ) | Yield ( $Y_{\text{CH}_4}$ ) (10 <sup>12</sup> cells mol CH <sub>4</sub> <sup>-1</sup> ) | CH <sub>4</sub> prod. rate (fmol CH <sub>4</sub> cell <sup>-1</sup> h <sup>-1</sup> ) |
|------------------|---------------------------------------|-----------------------------------------------------------------------------------------|---------------------------------------------------------------------------------------|
| Maltose          | 0.11                                  | 5.5                                                                                     | 28.9                                                                                  |
| Maltose          | 0.10                                  | 9.8                                                                                     | 14.7                                                                                  |
| Maltose          | 0.09                                  | 5.3                                                                                     | 24.5                                                                                  |
| Maltose          | 0.14                                  | 8.8                                                                                     | 23.0                                                                                  |
| Maltose          | 0.17                                  | 16.0                                                                                    | 15.3                                                                                  |
| Formate          | 0.24                                  | 10.4                                                                                    | 33.3                                                                                  |
| Formate          | 0.29                                  | 11.6                                                                                    | 36.1                                                                                  |
| Formate          | 0.24                                  | 17.8                                                                                    | 19.4                                                                                  |
| Formate          | 0.14                                  | 9.2                                                                                     | 22.0                                                                                  |
| Formate          | 0.17                                  | 18.7                                                                                    | 13.1                                                                                  |

Cell-specific CH<sub>4</sub> production rate ( $q$ ) = ( $k/[0.693 \times Y_{\text{CH}_4}]$ )



**Table S3. Growth metabolite production kinetic data for *Thermococcus paralvinellae***

| Growth condition | Growth rate ( $k$ , $h^{-1}$ ) | Yield ( $Y_{H_2}$ ) ( $10^{12}$ cells mol $H_2^{-1}$ ) | $H_2$ prod. rate (fmol $H_2$ cell $^{-1}$ h $^{-1}$ ) <sup>a</sup> | Yield ( $Y_{acetate}$ ) ( $10^{12}$ cells mol acetate $^{-1}$ ) | Acetate prod. rate (pmol acetate cell $^{-1}$ h $^{-1}$ ) | Yield ( $Y_{formate}$ ) ( $10^{12}$ cells mol formate $^{-1}$ ) | Formate prod. rate (pmol formate cell $^{-1}$ h $^{-1}$ ) |
|------------------|--------------------------------|--------------------------------------------------------|--------------------------------------------------------------------|-----------------------------------------------------------------|-----------------------------------------------------------|-----------------------------------------------------------------|-----------------------------------------------------------|
| Monoculture:     |                                |                                                        |                                                                    |                                                                 |                                                           |                                                                 |                                                           |
| Maltose          | 0.16                           | 286                                                    | 0.81                                                               | 0.19                                                            | 1.21                                                      | 0.27                                                            | 0.86                                                      |
| Maltose          | 0.13                           | 192                                                    | 0.98                                                               | 0.28                                                            | 0.67                                                      | 0.75                                                            | 0.25                                                      |
| Maltose          | 0.18                           | 318                                                    | 0.82                                                               | 0.28                                                            | 0.93                                                      | 0.38                                                            | 0.68                                                      |
| Co-culture:      |                                |                                                        |                                                                    |                                                                 |                                                           |                                                                 |                                                           |
| Maltose          | 0.19                           | 7,375 <sup>b</sup>                                     | 0.04 <sup>b</sup>                                                  | 0.22                                                            | 1.25                                                      | 0                                                               | 0                                                         |
| Maltose          | 0.24                           | 6,866 <sup>b</sup>                                     | 0.05 <sup>b</sup>                                                  | 0.40                                                            | 0.87                                                      | 0                                                               | 0                                                         |
| Maltose          | 0.20                           | 4,069 <sup>b</sup>                                     | 0.07 <sup>b</sup>                                                  | 0.21                                                            | 1.37                                                      | 0                                                               | 0                                                         |
| Maltose          | 0.26                           | 8,966 <sup>b</sup>                                     | 0.04 <sup>b</sup>                                                  | 0.52                                                            | 0.72                                                      | 0                                                               | 0                                                         |
| Monoculture:     |                                |                                                        |                                                                    |                                                                 |                                                           |                                                                 |                                                           |
| Formate          | 0.22                           | -                                                      | -                                                                  | -                                                               | -                                                         | -                                                               | -                                                         |
| Formate          | 0.29                           | 2.8                                                    | 149.5                                                              | -                                                               | -                                                         | -                                                               | -                                                         |
| Formate          | 0.11                           | 1.2                                                    | 132.3                                                              | -                                                               | -                                                         | -                                                               | -                                                         |
| Formate          | 0.10                           | 1.3                                                    | 111.0                                                              | -                                                               | -                                                         | -                                                               | -                                                         |
| Co-culture:      |                                |                                                        |                                                                    |                                                                 |                                                           |                                                                 |                                                           |
| Formate          | 0.17                           | 704 <sup>b</sup>                                       | 0.35 <sup>b</sup>                                                  | -                                                               | -                                                         | -                                                               | -                                                         |
| Formate          | 0.17                           | 2,489 <sup>b</sup>                                     | 0.10 <sup>b</sup>                                                  | -                                                               | -                                                         | -                                                               | -                                                         |
| Formate          | 0.24                           | 2,325 <sup>b</sup>                                     | 0.15 <sup>b</sup>                                                  | -                                                               | -                                                         | -                                                               | -                                                         |
| Formate          | 0.11                           | 598 <sup>b</sup>                                       | 0.27 <sup>b</sup>                                                  | -                                                               | -                                                         | -                                                               | -                                                         |
| Formate          | 0.13                           | 1,089 <sup>b</sup>                                     | 0.17 <sup>b</sup>                                                  | -                                                               | -                                                         | -                                                               | -                                                         |

<sup>a</sup>Cell-specific  $H_2$ , acetate, or formate production rate = ( $k/[0.693 \times Y_{product}]$ )

<sup>b</sup>Based on net  $H_2$  production in co-culture

**Table S4.** Coding sequences that showed significant and more than two-fold differences in gene expression for high H<sub>2</sub> growth versus low H<sub>2</sub> growth. Expression counts are normalized for size factor.

| Coding sequence | Low H <sub>2</sub> |         |         | High H <sub>2</sub> |         |         | Log <sub>2</sub> FC |
|-----------------|--------------------|---------|---------|---------------------|---------|---------|---------------------|
|                 | L1                 | L2      | L3      | H1                  | H2      | H3      |                     |
| MJ_RS01685      | 1370.6             | 1423.8  | 2327.9  | 752.2               | 447.4   | 350.9   | -1.72               |
| MJ_RS01910      | 152.9              | 67.1    | 210.3   | 29.7                | 45.2    | 32.7    | -2.01               |
| MJ_RS03980      | 2667.1             | 3121.7  | 1696.3  | 858.6               | 1116.0  | 804.2   | -1.43               |
| MJ_RS09325      | 326.1              | 475.5   | 607.8   | 240.8               | 165.0   | 173.3   | -1.28               |
| MJ_RS04390      | 429.0              | 447.6   | 575.4   | 217.7               | 79.4    | 78.1    | -1.94               |
| MJ_RS04990      | 23238.4            | 23022.4 | 13108.6 | 36915.9             | 55159.0 | 65542.9 | 1.41                |
| MJ_RS05550      | 1059.9             | 1524.5  | 1374.3  | 479.2               | 465.7   | 443.3   | -1.51               |
| MJ_RS05555      | 27258.7            | 35536.4 | 16861.6 | 6294.1              | 8235.9  | 8493.7  | -1.79               |
| MJ_RS06225      | 1419.6             | 1450.8  | 2623.0  | 846.3               | 694.3   | 548.4   | -1.39               |
| MJ_RS06835      | 2919.1             | 2682.6  | 3236.1  | 1016.2              | 962.0   | 1140.9  | -1.50               |
| MJ_RS06840      | 2915.3             | 2684.4  | 3246.9  | 1087.1              | 723.6   | 910.8   | -1.70               |
| MJ_RS06845      | 1224.4             | 1766.9  | 1200.9  | 352.2               | 512.1   | 642.2   | -1.48               |

**Table S5.** Coding sequences that showed significant and more than two-fold differences in gene expression for co-culture growth versus mono-culture growth. Expression counts are normalized for size factor.

| Coding sequence | Co-culture   |          |          |              |          |          |          | Mono-culture        |         |          |                    |         |          | Log <sub>2</sub> FC |
|-----------------|--------------|----------|----------|--------------|----------|----------|----------|---------------------|---------|----------|--------------------|---------|----------|---------------------|
|                 | 0.5% Maltose |          |          | 0.1% formate |          |          |          | High H <sub>2</sub> |         |          | Low H <sub>2</sub> |         |          |                     |
|                 | M1           | M2       | M3       | F1           | F2       | F3       | F4       | H1                  | H2      | H3       | L1                 | L2      | L3       |                     |
| MJ_RS00060      | 415.5        | 595.8    | 456.8    | 473.3        | 610.1    | 440.1    | 300.9    | 151.3               | 258.7   | 268.2    | 154.7              | 216.8   | 236.0    | 1.12                |
| MJ_RS00100      | 519.4        | 1160.2   | 1636.8   | 742.9        | 1261.3   | 538.9    | 470.0    | 411.7               | 447.4   | 433.8    | 394.6              | 304.1   | 316.6    | 1.20                |
| MJ_RS00125      | 207.7        | 188.1    | 342.6    | 166.8        | 214.3    | 154.5    | 183.2    | 84.1                | 100.8   | 95.3     | 83.7               | 75.1    | 75.3     | 1.13                |
| MJ_RS00165      | 519.4        | 972.1    | 685.2    | 388.9        | 620.6    | 435.1    | 450.1    | 211.0               | 234.2   | 237.5    | 221.8              | 226.6   | 238.6    | 1.23                |
| MJ_RS00180      | 1558.1       | 1630.5   | 1103.9   | 1513.9       | 1675.0   | 1174.2   | 1274.9   | 2657.8              | 2975.0  | 3780.4   | 2937.0             | 2856.9  | 3954.6   | -1.17               |
| MJ_RS00225      | 51.9         | 125.4    | 76.1     | 99.9         | 99.2     | 95.5     | 85.4     | 44.8                | 43.8    | 28.6     | 34.5               | 47.3    | 46.7     | 1.20                |
| MJ_RS00230      | 415.5        | 282.2    | 532.9    | 344.3        | 296.6    | 282.3    | 229.6    | 101.1               | 178.0   | 116.6    | 106.7              | 145.1   | 120.5    | 1.28                |
| MJ_RS00235      | 2025.5       | 2822.1   | 3273.6   | 3308.0       | 3665.7   | 2788.5   | 1918.1   | 359.1               | 719.9   | 568.7    | 401.3              | 538.7   | 438.7    | 2.50                |
| MJ_RS00250      | 519.4        | 125.4    | 152.3    | 349.1        | 473.9    | 316.4    | 322.4    | 117.4               | 190.3   | 148.4    | 88.3               | 159.8   | 94.5     | 1.34                |
| MJ_RS00255      | 207.7        | 125.4    | 0.0      | 128.0        | 91.8     | 64.8     | 62.2     | 287.8               | 212.2   | 251.0    | 261.6              | 317.7   | 313.9    | -1.64               |
| MJ_RS00260      | 103.9        | 31.4     | 152.3    | 60.1         | 73.9     | 78.9     | 75.4     | 164.7               | 210.6   | 256.1    | 157.5              | 179.9   | 129.5    | -1.31               |
| MJ_RS00300      | 0.0          | 0.0      | 38.1     | 26.2         | 19.0     | 49.0     | 41.4     | 60.6                | 78.1    | 99.6     | 54.9               | 65.1    | 66.5     | -1.12               |
| MJ_RS00430      | 0.0          | 62.7     | 76.1     | 195.9        | 135.1    | 166.9    | 155.0    | 52.9                | 32.7    | 28.6     | 54.3               | 31.8    | 106.6    | 1.41                |
| MJ_RS00435      | 0.0          | 62.7     | 38.1     | 225.0        | 157.3    | 157.8    | 185.7    | 46.7                | 49.3    | 51.1     | 48.5               | 35.6    | 77.7     | 1.55                |
| MJ_RS00440      | 51.9         | 31.4     | 0.0      | 67.9         | 52.8     | 73.1     | 93.7     | 21.3                | 23.9    | 20.4     | 19.0               | 14.9    | 41.4     | 1.49                |
| MJ_RS00475      | 259.7        | 94.1     | 152.3    | 183.3        | 139.3    | 201.8    | 203.1    | 86.5                | 80.1    | 60.5     | 50.5               | 63.1    | 78.3     | 1.36                |
| MJ_RS00490      | 415.5        | 689.8    | 609.1    | 283.2        | 311.4    | 177.7    | 178.2    | 945.8               | 1031.0  | 1320.8   | 655.4              | 886.0   | 920.5    | -1.52               |
| MJ_RS00535      | 207.7        | 439.0    | 342.6    | 429.6        | 350.4    | 448.4    | 383.0    | 173.3               | 178.6   | 167.4    | 176.7              | 198.2   | 180.0    | 1.14                |
| MJ_RS00540      | 831.0        | 1003.4   | 1180.0   | 873.8        | 813.8    | 777.3    | 765.1    | 207.5               | 289.5   | 298.4    | 260.8              | 274.4   | 194.2    | 1.76                |
| MJ_RS00615      | 51.9         | 62.7     | 76.1     | 39.8         | 32.7     | 47.3     | 32.3     | 76.8                | 59.9    | 55.7     | 79.3               | 84.4    | 169.8    | -1.11               |
| MJ_RS00630      | 1194.5       | 878.0    | 989.7    | 911.6        | 942.5    | 808.8    | 810.7    | 316.5               | 506.9   | 498.1    | 326.1              | 470.0   | 312.4    | 1.16                |
| purP            | 1142.6       | 1128.8   | 1294.2   | 1896.0       | 1303.5   | 1518.0   | 1584.9   | 5046.5              | 4464.4  | 2417.7   | 3348.8             | 4669.4  | 1467.0   | -1.32               |
| MJ_RS00710      | 3168.1       | 3511.9   | 3768.5   | 3630.0       | 3799.7   | 2970.4   | 3349.6   | 849.4               | 1397.8  | 1151.1   | 782.8              | 1181.7  | 568.0    | 1.81                |
| MJ_RS00720      | 51.9         | 0.0      | 38.1     | 38.8         | 38.0     | 59.0     | 46.4     | 82.9                | 55.2    | 58.4     | 114.5              | 121.4   | 160.7    | -1.18               |
| MJ_RS00730      | 0.0          | 31.4     | 38.1     | 25.2         | 24.3     | 32.4     | 32.3     | 5.9                 | 10.1    | 16.9     | 5.8                | 6.4     | 11.3     | 1.60                |
| MJ_RS09285      | 259.7        | 125.4    | 342.6    | 128.0        | 108.7    | 162.8    | 165.0    | 401.6               | 420.4   | 417.5    | 298.5              | 387.7   | 378.2    | -1.32               |
| MJ_RS00815      | 27544        | 2541703. | 2220143. | 937056.      | 1425908. | 949855.6 | 1049826. | 32978               | 715134. | 895359.2 | 44004              | 481388. | 518183.6 | 1.59                |
|                 | 54.5         | 3        | 5        | 2            | 5        |          | 0        | 6.3                 | 3       |          | 0.4                | 9       |          |                     |
| MJ_RS00825      | 27827        | 277725.4 | 193373.7 | 102413.      | 188071.1 | 107873.0 | 121877.8 | 29600.              | 70341.9 | 81325.0  | 39350.             | 41994.8 | 56181.0  | 1.77                |
|                 | 0.7          |          |          | 2            |          |          |          | 5                   |         |          | 0                  |         |          |                     |
| MJ_RS00835      | 779.0        | 878.0    | 799.4    | 1243.3       | 1168.4   | 1072.9   | 1012.1   | 570.2               | 558.8   | 480.5    | 527.2              | 536.7   | 364.1    | 1.04                |
| MJ_RS00975      | 51.9         | 31.4     | 0.0      | 22.3         | 36.9     | 34.0     | 31.5     | 64.7                | 50.3    | 47.2     | 83.5               | 64.0    | 64.6     | -1.01               |
| MJ_RS01025      | 103.9        | 125.4    | 76.1     | 103.8        | 153.0    | 70.6     | 92.8     | 17.0                | 31.2    | 29.3     | 21.3               | 26.1    | 28.3     | 2.04                |
| MJ_RS01050      | 0.0          | 62.7     | 38.1     | 51.4         | 54.9     | 41.5     | 43.9     | 101.8               | 69.8    | 86.8     | 102.3              | 127.3   | 215.5    | -1.32               |
| MJ_RS01090      | 103.9        | 31.4     | 38.1     | 16.5         | 19.0     | 12.5     | 11.6     | 44.4                | 40.2    | 33.7     | 43.5               | 43.9    | 64.1     | -1.37               |
| MJ_RS01110      | 103.9        | 313.6    | 266.5    | 228.9        | 240.6    | 285.7    | 279.3    | 515.1               | 691.1   | 753.3    | 509.7              | 375.4   | 244.5    | -1.02               |
| MJ_RS01135      | 2025.5       | 1442.4   | 1408.4   | 1345.1       | 1236.0   | 1618.5   | 1364.4   | 3520.2              | 4409.8  | 5107.7   | 3582.3             | 3191.8  | 2505.4   | -1.35               |
| MJ_RS01145      | 831.0        | 721.2    | 456.8    | 464.5        | 472.9    | 564.7    | 518.9    | 1074.1              | 1232.5  | 1720.5   | 1361.2             | 955.6   | 865.6    | -1.14               |
| MJ_RS01150      | 727.1        | 344.9    | 304.5    | 344.3        | 260.7    | 414.4    | 344.0    | 1113.2              | 841.1   | 1183.6   | 1074.7             | 899.9   | 698.8    | -1.43               |
| MJ_RS01155      | 882.9        | 627.1    | 304.5    | 377.3        | 234.3    | 463.4    | 363.1    | 1339.8              | 1434.8  | 1948.8   | 1286.4             | 1237.3  | 1036.4   | -1.71               |
| MJ_RS01160      | 1402.3       | 658.5    | 1027.8   | 1012.5       | 917.2    | 1279.7   | 1064.3   | 2425.6              | 1782.5  | 2377.1   | 3149.9             | 1904.3  | 2116.4   | -1.13               |
| MJ_RS01165      | 415.5        | 125.4    | 152.3    | 139.7        | 136.2    | 177.7    | 169.9    | 448.0               | 271.3   | 281.7    | 600.8              | 326.6   | 346.9    | -1.20               |
| MJ_RS01170      | 259.7        | 250.9    | 152.3    | 164.9        | 172.0    | 149.5    | 141.7    | 489.7               | 384.3   | 586.3    | 495.2              | 432.3   | 878.5    | -1.71               |

|            |        |        |        |        |        |        |        |        |        |        |        |        |        |       |
|------------|--------|--------|--------|--------|--------|--------|--------|--------|--------|--------|--------|--------|--------|-------|
| MJ_RS01195 | 0.0    | 0.0    | 38.1   | 29.1   | 19.0   | 24.1   | 9.9    | 58.0   | 39.0   | 45.6   | 50.1   | 61.6   | 96.8   | -1.55 |
| MJ_RS01240 | 0.0    | 62.7   | 76.1   | 57.2   | 71.8   | 53.1   | 59.7   | 26.5   | 17.0   | 13.3   | 23.8   | 16.0   | 25.2   | 1.55  |
| MJ_RS01275 | 51.9   | 156.8  | 190.3  | 177.5  | 176.3  | 175.2  | 168.3  | 75.9   | 61.3   | 59.8   | 78.1   | 62.0   | 80.5   | 1.30  |
| MJ_RS01290 | 259.7  | 250.9  | 228.4  | 168.7  | 207.9  | 266.6  | 268.6  | 407.2  | 604.1  | 650.9  | 409.2  | 419.1  | 428.3  | -1.07 |
| MJ_RS01295 | 0.0    | 31.4   | 76.1   | 44.6   | 61.2   | 48.2   | 55.5   | 186.5  | 152.6  | 172.5  | 180.4  | 168.7  | 180.8  | -1.75 |
| MJ_RS01305 | 155.8  | 376.3  | 342.6  | 284.2  | 298.7  | 216.7  | 244.5  | 696.9  | 528.4  | 539.4  | 603.1  | 597.9  | 581.5  | -1.15 |
| MJ_RS01310 | 571.3  | 1003.4 | 799.4  | 553.8  | 661.8  | 599.6  | 583.6  | 1420.3 | 1470.3 | 1663.5 | 1406.0 | 1394.4 | 1515.3 | -1.21 |
| MJ_RS01320 | 51.9   | 250.9  | 304.5  | 46.6   | 70.7   | 33.2   | 44.8   | 15.8   | 19.1   | 18.6   | 17.6   | 29.3   | 37.2   | 1.91  |
| MJ_RS01350 | 103.9  | 125.4  | 114.2  | 87.3   | 89.7   | 85.5   | 84.5   | 193.3  | 162.5  | 248.0  | 196.1  | 181.8  | 232.2  | -1.19 |
| MJ_RS01375 | 0.0    | 0.0    | 76.1   | 15.5   | 25.3   | 30.7   | 26.5   | 78.6   | 76.3   | 94.8   | 74.2   | 73.4   | 78.7   | -1.68 |
| MJ_RS01385 | 259.7  | 188.1  | 114.2  | 162.9  | 106.6  | 160.3  | 172.4  | 510.1  | 304.2  | 277.8  | 592.1  | 499.9  | 459.8  | -1.50 |
| porA       | 882.9  | 909.3  | 456.8  | 294.8  | 503.5  | 587.9  | 357.3  | 854.8  | 945.3  | 982.6  | 2230.7 | 1322.2 | 807.3  | -1.15 |
| MJ_RS01410 | 51.9   | 250.9  | 228.4  | 66.9   | 91.8   | 136.2  | 82.1   | 294.4  | 328.9  | 268.0  | 781.8  | 403.2  | 242.1  | -1.78 |
| MJ_RS01415 | 207.7  | 219.5  | 76.1   | 51.4   | 65.4   | 108.8  | 51.4   | 208.0  | 175.9  | 160.3  | 593.0  | 293.1  | 151.2  | -1.56 |
| MJ_RS01445 | 0.0    | 125.4  | 152.3  | 104.7  | 121.4  | 132.0  | 125.2  | 34.6   | 45.9   | 30.0   | 32.5   | 46.7   | 56.5   | 1.53  |
| MJ_RS01455 | 103.9  | 344.9  | 304.5  | 323.9  | 310.3  | 239.2  | 316.6  | 644.4  | 699.0  | 709.3  | 505.6  | 600.0  | 395.4  | -1.02 |
| MJ_RS01480 | 0.0    | 62.7   | 0.0    | 21.3   | 25.3   | 14.9   | 19.1   | 52.4   | 29.6   | 33.4   | 49.0   | 48.1   | 100.9  | -1.35 |
| MJ_RS01510 | 5609.0 | 4797.6 | 3882.7 | 5525.0 | 4978.7 | 4790.6 | 4615.4 | 1810.0 | 2937.3 | 3269.7 | 1613.6 | 2853.2 | 1646.5 | 1.05  |
| MJ_RS01515 | 0.0    | 31.4   | 0.0    | 17.5   | 6.3    | 16.6   | 23.2   | 31.5   | 33.1   | 36.9   | 30.0   | 31.6   | 41.4   | -1.09 |
| MJ_RS01535 | 0.0    | 0.0    | 114.2  | 35.9   | 35.9   | 28.2   | 37.3   | 112.2  | 95.8   | 65.3   | 63.6   | 135.7  | 80.6   | -1.42 |
| MJ_RS01545 | 0.0    | 62.7   | 76.1   | 41.7   | 59.1   | 52.3   | 40.6   | 103.3  | 75.1   | 88.4   | 228.6  | 96.3   | 90.4   | -1.22 |
| MJ_RS01560 | 0.0    | 0.0    | 38.1   | 16.5   | 16.9   | 21.6   | 29.8   | 58.0   | 39.0   | 33.7   | 44.5   | 44.7   | 65.1   | -1.18 |
| MJ_RS01570 | 51.9   | 31.4   | 76.1   | 49.5   | 41.2   | 78.1   | 79.6   | 161.0  | 141.6  | 115.4  | 134.7  | 123.3  | 162.6  | -1.18 |
| MJ_RS01610 | 467.4  | 1191.6 | 1218.1 | 659.5  | 704.0  | 423.5  | 450.1  | 363.0  | 221.8  | 169.0  | 319.1  | 419.9  | 404.4  | 1.15  |
| MJ_RS01665 | 103.9  | 62.7   | 152.3  | 38.8   | 40.1   | 36.5   | 31.5   | 208.8  | 98.0   | 111.5  | 221.0  | 181.9  | 366.1  | -2.12 |
| MJ_RS01675 | 2648.7 | 3041.6 | 3349.8 | 2528.3 | 1229.6 | 2440.6 | 1637.9 | 6560.7 | 8474.3 | 6726.0 | 5228.8 | 5455.6 | 2590.8 | -1.30 |
| MJ_RS01680 | 779.0  | 439.0  | 609.1  | 749.7  | 728.3  | 1118.6 | 1340.3 | 340.2  | 392.0  | 399.7  | 318.4  | 401.6  | 397.4  | 1.21  |
| MJ_RS01705 | 0.0    | 94.1   | 76.1   | 61.1   | 57.0   | 54.0   | 49.7   | 100.8  | 76.9   | 85.2   | 115.7  | 103.5  | 211.8  | -1.04 |
| MJ_RS01720 | 0.0    | 219.5  | 114.2  | 7.8    | 9.5    | 14.9   | 15.7   | 4.0    | 6.1    | 6.4    | 4.2    | 7.5    | 19.6   | 2.38  |
| MJ_RS01755 | 0.0    | 0.0    | 38.1   | 9.7    | 7.4    | 6.6    | 9.1    | 9.7    | 24.8   | 38.5   | 17.9   | 18.1   | 27.6   | -1.40 |
| MJ_RS01845 | 0.0    | 0.0    | 38.1   | 9.7    | 5.3    | 14.1   | 7.5    | 19.4   | 21.1   | 19.0   | 29.7   | 22.1   | 55.1   | -1.54 |
| MJ_RS01865 | 103.9  | 282.2  | 0.0    | 67.9   | 87.6   | 53.1   | 30.7   | 277.1  | 174.5  | 198.3  | 270.0  | 279.7  | 402.4  | -1.89 |
| MJ_RS01870 | 51.9   | 156.8  | 114.2  | 43.6   | 66.5   | 33.2   | 25.7   | 138.2  | 63.5   | 69.2   | 148.5  | 140.2  | 233.7  | -1.31 |
| MJ_RS01900 | 363.5  | 689.8  | 647.1  | 614.9  | 562.6  | 759.0  | 673.9  | 225.3  | 189.3  | 131.7  | 225.8  | 309.8  | 303.3  | 1.45  |
| MJ_RS01910 | 0.0    | 0.0    | 0.0    | 1.0    | 2.1    | 0.8    | 5.8    | 4.9    | 7.3    | 5.3    | 24.7   | 11.1   | 36.4   | -2.26 |
| MJ_RS01915 | 103.9  | 62.7   | 0.0    | 25.2   | 39.1   | 31.6   | 36.5   | 66.1   | 66.4   | 90.2   | 171.1  | 102.9  | 263.6  | -1.85 |
| MJ_RS01965 | 934.8  | 878.0  | 456.8  | 803.0  | 966.8  | 728.3  | 709.5  | 2071.6 | 2580.8 | 2989.6 | 2463.1 | 1852.7 | 2265.8 | -1.59 |
| MJ_RS01995 | 51.9   | 31.4   | 38.1   | 27.2   | 27.4   | 26.6   | 25.7   | 70.3   | 79.3   | 86.1   | 56.9   | 67.6   | 78.2   | -1.43 |
| MJ_RS02005 | 311.6  | 188.1  | 342.6  | 220.1  | 174.2  | 246.6  | 202.3  | 458.4  | 619.9  | 646.1  | 544.3  | 398.1  | 565.6  | -1.29 |
| MJ_RS02010 | 155.8  | 94.1   | 190.3  | 81.5   | 49.6   | 78.9   | 95.3   | 243.9  | 284.3  | 313.3  | 342.0  | 193.1  | 301.2  | -1.73 |
| MJ_RS02015 | 103.9  | 125.4  | 76.1   | 101.8  | 95.0   | 142.0  | 112.7  | 430.6  | 502.8  | 486.7  | 545.7  | 338.2  | 453.8  | -2.03 |
| MJ_RS02020 | 207.7  | 250.9  | 418.7  | 194.0  | 206.9  | 146.2  | 135.1  | 514.7  | 433.6  | 442.0  | 479.8  | 458.8  | 471.5  | -1.31 |
| MJ_RS02025 | 1298.4 | 2069.5 | 2398.1 | 1461.5 | 1716.2 | 1738.1 | 1995.2 | 785.1  | 1018.4 | 917.3  | 752.4  | 1002.3 | 884.0  | 1.01  |
| MJ_RS02030 | 1246.5 | 1975.5 | 2207.8 | 1605.0 | 1712.0 | 2254.6 | 2440.3 | 311.3  | 584.6  | 527.5  | 321.2  | 568.5  | 378.8  | 2.11  |
| MJ_RS02100 | 1194.5 | 2069.5 | 2436.2 | 702.1  | 775.8  | 769.8  | 817.3  | 237.4  | 69.4   | 88.4   | 211.2  | 271.3  | 661.1  | 2.26  |
| MJ_RS02115 | 623.2  | 344.9  | 799.4  | 750.6  | 527.7  | 734.1  | 622.5  | 2133.0 | 1943.1 | 2324.0 | 2203.0 | 1716.8 | 1643.7 | -1.64 |
| MJ_RS02130 | 1765.8 | 1317.0 | 1827.2 | 1617.6 | 1399.6 | 1088.7 | 1092.5 | 646.0  | 607.3  | 497.7  | 560.4  | 875.3  | 637.1  | 1.14  |
| MJ_RS02285 | 0.0    | 31.4   | 0.0    | 20.4   | 20.1   | 18.3   | 25.7   | 53.0   | 43.0   | 43.7   | 42.1   | 57.7   | 72.3   | -1.33 |
| MJ_RS02405 | 0.0    | 0.0    | 38.1   | 9.7    | 11.6   | 7.5    | 13.3   | 31.0   | 20.7   | 19.9   | 24.9   | 21.5   | 47.8   | -1.37 |
| MJ_RS02415 | 103.9  | 188.1  | 228.4  | 148.4  | 133.0  | 134.5  | 127.7  | 358.9  | 228.3  | 235.2  | 289.7  | 276.7  | 308.3  | -1.02 |

|            |         |         |         |         |         |         |         |        |        |        |        |        |        |       |
|------------|---------|---------|---------|---------|---------|---------|---------|--------|--------|--------|--------|--------|--------|-------|
| MJ_RS02420 | 675.2   | 313.6   | 342.6   | 375.3   | 443.3   | 432.6   | 466.7   | 916.1  | 947.6  | 1207.9 | 891.6  | 797.4  | 661.3  | -1.08 |
| MJ_RS02440 | 103.9   | 219.5   | 152.3   | 264.8   | 323.0   | 222.6   | 274.4   | 460.3  | 513.4  | 645.6  | 747.5  | 491.8  | 600.4  | -1.19 |
| rps14P     | 259.7   | 250.9   | 228.4   | 220.1   | 183.7   | 124.6   | 135.9   | 249.0  | 363.8  | 484.6  | 442.5  | 259.9  | 370.5  | -1.01 |
| MJ_RS02550 | 727.1   | 815.3   | 685.2   | 517.9   | 608.0   | 709.2   | 702.1   | 1400.3 | 2038.8 | 2293.3 | 1300.5 | 1499.9 | 936.3  | -1.24 |
| MJ_RS02640 | 51.9    | 376.3   | 266.5   | 226.9   | 283.9   | 230.9   | 180.7   | 544.5  | 532.0  | 597.3  | 394.4  | 497.3  | 531.4  | -1.15 |
| MJ_RS02705 | 1713.9  | 2383.1  | 2474.3  | 4606.6  | 3525.3  | 3731.0  | 4039.3  | 1067.0 | 1557.7 | 1654.3 | 1255.0 | 1040.6 | 1068.3 | 1.37  |
| MJ_RS02710 | 467.4   | 595.8   | 1142.0  | 1762.1  | 1165.2  | 1190.0  | 1250.8  | 487.2  | 606.5  | 598.9  | 670.2  | 450.3  | 526.6  | 1.03  |
| MJ_RS02730 | 207.7   | 250.9   | 228.4   | 141.6   | 383.1   | 230.9   | 205.6   | 337.3  | 1115.2 | 862.8  | 280.9  | 455.4  | 182.0  | -1.18 |
| MJ_RS02745 | 0.0     | 31.4    | 76.1    | 50.4    | 126.7   | 116.3   | 102.0   | 121.6  | 403.2  | 442.0  | 122.2  | 161.7  | 70.6   | -1.37 |
| MJ_RS02750 | 51.9    | 94.1    | 266.5   | 88.3    | 183.7   | 181.9   | 164.1   | 339.2  | 1545.8 | 1344.9 | 333.6  | 460.6  | 177.5  | -2.22 |
| MJ_RS02755 | 311.6   | 439.0   | 304.5   | 179.4   | 408.5   | 382.0   | 324.9   | 886.2  | 2472.6 | 2468.1 | 778.3  | 1051.2 | 444.9  | -2.02 |
| MJ_RS02760 | 103.9   | 94.1    | 76.1    | 63.0    | 121.4   | 129.5   | 103.6   | 216.5  | 588.8  | 597.8  | 216.5  | 269.9  | 113.7  | -1.72 |
| MJ_RS02765 | 207.7   | 219.5   | 304.5   | 98.9    | 207.9   | 196.8   | 181.5   | 493.1  | 1282.2 | 1190.7 | 625.7  | 634.2  | 294.4  | -1.99 |
| MJ_RS02770 | 519.4   | 94.1    | 190.3   | 116.4   | 212.2   | 210.1   | 186.5   | 426.8  | 918.6  | 927.4  | 549.0  | 478.7  | 231.5  | -1.57 |
| MJ_RS02775 | 259.7   | 250.9   | 418.7   | 161.0   | 320.9   | 311.4   | 263.6   | 736.6  | 2126.9 | 2285.5 | 1108.0 | 919.5  | 431.6  | -2.19 |
| MJ_RS02780 | 51.9    | 156.8   | 152.3   | 106.7   | 175.2   | 157.8   | 179.9   | 412.0  | 1034.4 | 1015.1 | 654.3  | 479.6  | 200.9  | -2.09 |
| MJ_RS02785 | 51.9    | 219.5   | 76.1    | 47.5    | 122.4   | 115.4   | 118.5   | 383.4  | 791.5  | 747.6  | 573.3  | 418.4  | 176.0  | -2.28 |
| MJ_RS02790 | 0.0     | 219.5   | 152.3   | 45.6    | 83.4    | 89.7    | 81.2    | 248.5  | 557.8  | 486.9  | 414.6  | 311.5  | 134.0  | -2.06 |
| MJ_RS02795 | 363.5   | 470.3   | 266.5   | 97.0    | 268.1   | 245.8   | 259.4   | 599.9  | 1131.4 | 873.5  | 1105.8 | 714.2  | 263.2  | -1.58 |
| MJ_RS02800 | 363.5   | 282.2   | 342.6   | 94.1    | 297.6   | 218.4   | 208.9   | 568.4  | 967.9  | 657.3  | 992.6  | 668.8  | 224.5  | -1.51 |
| MJ_RS02805 | 779.0   | 313.6   | 342.6   | 135.8   | 339.9   | 231.7   | 290.1   | 1365.6 | 1837.3 | 1253.0 | 1990.1 | 1468.4 | 448.8  | -2.15 |
| MJ_RS02850 | 207.7   | 439.0   | 190.3   | 464.5   | 486.6   | 469.2   | 518.1   | 258.4  | 161.9  | 112.5  | 242.0  | 206.5  | 220.3  | 1.11  |
| MJ_RS02860 | 51.9    | 62.7    | 0.0     | 100.9   | 112.9   | 131.2   | 126.0   | 46.4   | 44.8   | 30.0   | 45.7   | 46.1   | 51.8   | 1.28  |
| MJ_RS02865 | 0.0     | 250.9   | 266.5   | 226.9   | 258.6   | 275.7   | 304.2   | 113.4  | 107.7  | 79.5   | 110.1  | 94.9   | 110.0  | 1.31  |
| MJ_RS02940 | 259.7   | 94.1    | 228.4   | 166.8   | 109.8   | 168.6   | 126.8   | 382.1  | 490.4  | 490.4  | 350.4  | 323.5  | 254.2  | -1.36 |
| MJ_RS02945 | 51.9    | 94.1    | 76.1    | 98.0    | 68.6    | 101.3   | 67.1    | 227.7  | 219.8  | 190.1  | 205.5  | 177.0  | 149.5  | -1.23 |
| MJ_RS02995 | 0.0     | 250.9   | 76.1    | 68.9    | 61.2    | 73.9    | 115.2   | 331.1  | 242.9  | 290.6  | 194.9  | 52.2   | 121.8  | -1.21 |
| MJ_RS03005 | 51.9    | 125.4   | 38.1    | 44.6    | 36.9    | 40.7    | 38.1    | 82.6   | 81.4   | 89.3   | 79.0   | 71.5   | 143.7  | -1.09 |
| MJ_RS03015 | 0.0     | 31.4    | 0.0     | 6.8     | 11.6    | 6.6     | 16.6    | 22.9   | 18.3   | 24.7   | 20.4   | 18.7   | 23.8   | -1.02 |
| MJ_RS03035 | 51.9    | 62.7    | 38.1    | 43.6    | 42.2    | 46.5    | 53.1    | 88.5   | 71.8   | 92.1   | 106.2  | 99.9   | 139.1  | -1.09 |
| MJ_RS03055 | 51.9    | 0.0     | 0.0     | 27.2    | 17.9    | 26.6    | 24.9    | 39.1   | 38.6   | 41.9   | 61.6   | 39.3   | 86.7   | -1.12 |
| MJ_RS03060 | 259.7   | 282.2   | 228.4   | 161.0   | 136.2   | 170.2   | 222.1   | 342.5  | 439.3  | 499.8  | 340.8  | 383.1  | 295.7  | -1.05 |
| MJ_RS03075 | 155.8   | 125.4   | 304.5   | 422.8   | 160.4   | 176.0   | 148.4   | 572.2  | 641.8  | 493.6  | 379.8  | 456.8  | 393.6  | -1.16 |
| MJ_RS03095 | 207.7   | 0.0     | 266.5   | 68.9    | 83.4    | 68.1    | 63.0    | 414.8  | 494.7  | 547.4  | 385.1  | 411.3  | 611.4  | -2.58 |
| MJ_RS03100 | 311.6   | 156.8   | 380.7   | 85.3    | 111.9   | 93.8    | 88.7    | 917.1  | 1045.4 | 1182.5 | 722.0  | 734.5  | 939.8  | -2.82 |
| MJ_RS03105 | 1713.9  | 1881.4  | 1636.8  | 1960.0  | 1946.3  | 1057.1  | 1088.4  | 723.5  | 890.6  | 635.6  | 612.5  | 850.4  | 750.6  | 1.10  |
| MJ_RS03260 | 51.9    | 31.4    | 114.2   | 63.0    | 48.6    | 62.3    | 41.4    | 151.7  | 92.5   | 116.6  | 170.8  | 128.4  | 95.2   | -1.20 |
| MJ_RS03285 | 259.7   | 282.2   | 190.3   | 331.7   | 343.0   | 284.0   | 335.7   | 165.6  | 132.9  | 88.9   | 156.9  | 181.9  | 165.2  | 1.05  |
| MJ_RS03310 | 467.4   | 595.8   | 609.1   | 576.1   | 480.2   | 700.9   | 690.5   | 259.6  | 259.5  | 165.4  | 229.6  | 249.5  | 209.8  | 1.39  |
| MJ_RS03330 | 103.9   | 188.1   | 76.1    | 162.9   | 203.7   | 255.8   | 315.8   | 79.9   | 61.5   | 46.7   | 61.7   | 85.2   | 90.4   | 1.58  |
| MJ_RS03335 | 103.9   | 62.7    | 152.3   | 217.2   | 207.9   | 246.6   | 272.7   | 90.3   | 67.8   | 57.7   | 61.6   | 90.6   | 110.4  | 1.40  |
| MJ_RS03380 | 51.9    | 0.0     | 38.1    | 48.5    | 68.6    | 70.6    | 75.4    | 24.2   | 17.5   | 17.4   | 25.2   | 22.3   | 33.9   | 1.40  |
| MJ_RS03395 | 0.0     | 0.0     | 0.0     | 48.5    | 47.5    | 39.0    | 34.8    | 87.1   | 96.4   | 96.9   | 63.8   | 81.5   | 70.7   | -1.11 |
| MJ_RS03420 | 0.0     | 31.4    | 0.0     | 32.0    | 43.3    | 29.9    | 34.8    | 52.5   | 52.4   | 54.3   | 57.7   | 69.7   | 136.5  | -1.10 |
| MJ_RS09320 | 0.0     | 156.8   | 114.2   | 74.7    | 46.4    | 72.2    | 92.0    | 201.3  | 216.1  | 171.5  | 128.0  | 197.4  | 203.8  | -1.33 |
| MJ_RS03470 | 51.9    | 407.6   | 380.7   | 265.7   | 353.6   | 227.5   | 201.4   | 85.4   | 136.2  | 112.7  | 78.2   | 128.5  | 103.3  | 1.33  |
| MJ_RS03480 | 13191.6 | 11570.6 | 11001.0 | 15261.0 | 10141.0 | 14246.5 | 18949.7 | 439.9  | 881.4  | 1033.4 | 423.7  | 584.5  | 249.4  | 4.49  |
| MJ_RS03490 | 51.9    | 156.8   | 0.0     | 36.9    | 34.8    | 34.0    | 49.7    | 114.3  | 82.8   | 105.6  | 97.8   | 100.1  | 146.1  | -1.38 |
| MJ_RS03495 | 623.2   | 815.3   | 1065.8  | 647.8   | 541.5   | 631.9   | 639.1   | 1461.9 | 2071.3 | 1734.9 | 1076.7 | 1965.7 | 1045.0 | -1.20 |

|            |        |          |          |         |          |          |          |        |         |           |        |         |          |       |
|------------|--------|----------|----------|---------|----------|----------|----------|--------|---------|-----------|--------|---------|----------|-------|
| MJ_RS03510 | 103.9  | 188.1    | 190.3    | 79.5    | 69.7     | 59.8     | 65.5     | 240.1  | 125.4   | 150.7     | 243.6  | 252.7   | 376.3    | -1.46 |
| MJ_RS03515 | 1817.7 | 2289.0   | 2854.9   | 3071.4  | 2653.5   | 2370.0   | 2354.1   | 889.9  | 1196.8  | 1114.7    | 887.9  | 1190.2  | 731.3    | 1.33  |
| MJ_RS03525 | 103.9  | 501.7    | 418.7    | 205.6   | 169.9    | 105.5    | 127.7    | 97.9   | 55.0    | 49.5      | 72.8   | 101.0   | 182.4    | 1.18  |
| MJ_RS03540 | 103.9  | 94.1     | 76.1     | 32.0    | 43.3     | 48.2     | 52.2     | 94.5   | 59.7    | 90.0      | 94.4   | 92.1    | 149.1    | -1.00 |
| MJ_RS03545 | 155.8  | 188.1    | 266.5    | 251.2   | 235.4    | 166.9    | 175.7    | 452.6  | 276.2   | 320.6     | 551.0  | 415.5   | 471.4    | -1.00 |
| MJ_RS03570 | 51.9   | 94.1     | 38.1     | 80.5    | 83.4     | 72.2     | 66.3     | 147.0  | 128.2   | 135.4     | 139.5  | 154.3   | 205.8    | -1.02 |
| MJ_RS03645 | 0.0    | 62.7     | 76.1     | 79.5    | 114.0    | 31.6     | 38.1     | 13.5   | 22.1    | 23.1      | 15.2   | 14.6    | 19.0     | 1.83  |
| MJ_RS03650 | 0.0    | 62.7     | 0.0      | 42.7    | 47.5     | 32.4     | 39.0     | 93.4   | 73.3    | 82.9      | 86.9   | 96.3    | 145.3    | -1.29 |
| MJ_RS03685 | 51.9   | 0.0      | 0.0      | 27.2    | 31.7     | 27.4     | 19.1     | 77.2   | 50.5    | 53.8      | 82.6   | 67.1    | 76.9     | -1.41 |
| MJ_RS03710 | 103.9  | 31.4     | 76.1     | 52.4    | 77.0     | 63.1     | 78.7     | 180.2  | 122.2   | 120.5     | 124.0  | 124.8   | 188.4    | -1.08 |
| MJ_RS03720 | 259.7  | 188.1    | 152.3    | 72.7    | 106.6    | 83.9     | 118.5    | 272.1  | 214.1   | 192.6     | 219.6  | 245.0   | 291.7    | -1.14 |
| MJ_RS03725 | 415.5  | 344.9    | 342.6    | 154.2   | 203.7    | 186.8    | 197.3    | 772.1  | 715.0   | 818.1     | 575.5  | 724.7   | 523.4    | -1.66 |
| MJ_RS03730 | 311.6  | 125.4    | 190.3    | 68.9    | 109.8    | 73.1     | 105.3    | 386.6  | 251.6   | 262.2     | 432.2  | 496.4   | 789.0    | -1.98 |
| MJ_RS03735 | 0.0    | 0.0      | 0.0      | 36.9    | 54.9     | 28.2     | 36.5     | 82.2   | 76.7    | 93.4      | 75.6   | 87.4    | 113.2    | -1.32 |
| MJ_RS03775 | 98043  | 978075.1 | 811522.5 | 387782. | 661575.8 | 382269.2 | 434893.1 | 10831  | 295432. | 336238.7  | 14662  | 164120. | 195537.2 | 1.67  |
|            | 9.5    |          |          | 5       |          |          |          | 4.5    | 6       |           | 6.8    | 4       |          |       |
| MJ_RS03785 | 35298  | 3266824. | 2921960. | 1156300 | 1820402. | 1141648. | 1273683. | 39659  | 902399. | 1106603.1 | 52257  | 593058. | 646991.9 | 1.64  |
|            | 00.5   | 6        | 7        | .7      | 3        | 3        | 8        | 4.1    | 9       |           | 5.5    | 1       |          |       |
| MJ_RS03810 | 51.9   | 156.8    | 304.5    | 108.6   | 83.4     | 98.8     | 110.2    | 207.7  | 264.8   | 259.7     | 210.6  | 236.7   | 231.1    | -1.12 |
| MJ_RS03815 | 103.9  | 0.0      | 0.0      | 20.4    | 15.8     | 34.0     | 33.2     | 62.2   | 85.6    | 88.2      | 36.2   | 53.1    | 45.8     | -1.25 |
| MJ_RS03820 | 0.0    | 31.4     | 0.0      | 37.8    | 46.4     | 43.2     | 32.3     | 125.4  | 93.9    | 78.1      | 49.9   | 52.0    | 63.8     | -1.05 |
| MJ_RS03825 | 155.8  | 125.4    | 76.1     | 76.6    | 83.4     | 103.0    | 60.5     | 176.2  | 238.0   | 253.1     | 151.2  | 182.1   | 184.8    | -1.23 |
| MJ_RS03845 | 207.7  | 156.8    | 190.3    | 196.9   | 214.3    | 165.3    | 152.5    | 479.1  | 507.3   | 544.0     | 427.9  | 279.9   | 276.3    | -1.20 |
| MJ_RS03890 | 103.9  | 721.2    | 532.9    | 381.1   | 1802.8   | 497.4    | 393.7    | 228.8  | 275.3   | 238.4     | 286.6  | 167.8   | 149.1    | 1.55  |
| MJ_RS03895 | 727.1  | 1693.3   | 1218.1   | 1126.9  | 5720.7   | 1694.9   | 1314.7   | 531.4  | 712.4   | 647.2     | 830.0  | 340.1   | 307.0    | 1.80  |
| MJ_RS03900 | 155.8  | 439.0    | 228.4    | 307.4   | 1154.7   | 351.3    | 359.7    | 145.6  | 132.9   | 100.8     | 226.6  | 89.5    | 46.2     | 1.86  |
| MJ_RS03910 | 2804.5 | 4045.0   | 2854.9   | 3284.8  | 10399.6  | 3766.7   | 2548.1   | 1706.6 | 2176.8  | 1605.5    | 3552.6 | 1447.7  | 505.3    | 1.22  |
| MJ_RS03915 | 5349.4 | 8372.2   | 6433.1   | 6796.4  | 23239.5  | 8091.5   | 5630.0   | 3236.7 | 4312.4  | 3248.8    | 7065.5 | 3043.2  | 722.0    | 1.34  |
| MJ_RS03920 | 4881.9 | 8873.9   | 6433.1   | 4497.0  | 17620.1  | 5660.9   | 4132.1   | 2460.9 | 3976.6  | 3361.1    | 6095.6 | 2523.5  | 501.1    | 1.24  |
| MJ_RS03950 | 4985.8 | 6522.2   | 6471.2   | 5698.6  | 9484.5   | 4297.4   | 4019.4   | 2185.6 | 2837.7  | 2125.0    | 3926.0 | 2984.0  | 961.7    | 1.24  |
| MJ_RS03980 | 934.8  | 1379.7   | 1065.8   | 723.5   | 1767.9   | 675.1    | 733.6    | 140.5  | 180.0   | 129.6     | 431.3  | 514.0   | 293.9    | 1.88  |
| MJ_RS04015 | 155.8  | 815.3    | 342.6    | 199.8   | 235.4    | 284.0    | 280.2    | 70.3   | 101.9   | 107.4     | 75.1   | 112.7   | 88.6     | 1.71  |
| MJ_RS04020 | 103.9  | 282.2    | 380.7    | 120.3   | 164.7    | 181.0    | 164.1    | 40.9   | 52.1    | 46.5      | 40.0   | 55.0    | 45.1     | 1.89  |
| MJ_RS04030 | 259.7  | 250.9    | 342.6    | 107.6   | 91.8     | 93.0     | 102.8    | 51.3   | 40.2    | 32.8      | 24.3   | 61.7    | 39.5     | 1.74  |
| MJ_RS04035 | 415.5  | 783.9    | 989.7    | 419.0   | 313.5    | 292.3    | 299.2    | 205.3  | 217.1   | 215.7     | 107.8  | 270.8   | 190.4    | 1.19  |
| MJ_RS04070 | 727.1  | 1160.2   | 1408.4   | 885.4   | 740.9    | 799.7    | 848.0    | 276.3  | 426.7   | 403.6     | 297.4  | 454.1   | 300.0    | 1.33  |
| MJ_RS04075 | 934.8  | 1254.3   | 685.2    | 837.9   | 641.7    | 685.9    | 588.5    | 201.4  | 247.5   | 224.0     | 194.9  | 319.8   | 181.2    | 1.75  |
| MJ_RS04080 | 7219.0 | 9124.8   | 9706.8   | 12003.4 | 9576.3   | 8700.2   | 8892.5   | 2926.2 | 3845.1  | 3139.6    | 2965.1 | 4626.7  | 2193.2   | 1.51  |
| MJ_RS04140 | 727.1  | 1034.8   | 532.9    | 614.9   | 620.6    | 610.4    | 684.7    | 239.9  | 368.5   | 224.5     | 217.3  | 390.9   | 321.8    | 1.19  |
| MJ_RS04145 | 363.5  | 501.7    | 304.5    | 425.7   | 405.3    | 430.2    | 567.0    | 132.4  | 115.5   | 87.0      | 117.4  | 164.9   | 155.1    | 1.79  |
| MJ_RS04175 | 0.0    | 94.1     | 38.1     | 45.6    | 55.9     | 44.8     | 45.6     | 101.5  | 81.6    | 94.4      | 79.6   | 102.1   | 140.9    | -1.06 |
| MJ_RS04180 | 4881.9 | 4797.6   | 4986.6   | 9404.3  | 4589.2   | 6483.9   | 4760.4   | 14656. | 13331.3 | 11160.1   | 9560.6 | 14141.5 | 10680.1  | -1.09 |
|            |        |          |          |         |          |          |          | 0      |         |           |        |         |          |       |
| MJ_RS04205 | 51.9   | 31.4     | 38.1     | 69.8    | 74.9     | 88.9     | 111.1    | 25.2   | 54.2    | 35.5      | 29.9   | 31.0    | 34.6     | 1.20  |
| MJ_RS04230 | 51.9   | 94.1     | 0.0      | 13.6    | 20.1     | 19.9     | 18.2     | 61.1   | 31.5    | 31.6      | 41.1   | 70.9    | 89.8     | -1.40 |
| MJ_RS04255 | 51.9   | 31.4     | 38.1     | 19.4    | 21.1     | 21.6     | 19.1     | 46.6   | 37.7    | 38.9      | 35.5   | 47.7    | 54.7     | -1.05 |
| MJ_RS04260 | 0.0    | 31.4     | 0.0      | 1.9     | 7.4      | 5.0      | 9.1      | 34.0   | 19.3    | 23.4      | 26.3   | 30.2    | 38.8     | -2.17 |
| MJ_RS04290 | 519.4  | 595.8    | 1142.0   | 614.9   | 530.9    | 694.2    | 804.9    | 328.5  | 402.2   | 333.0     | 271.7  | 357.4   | 204.3    | 1.12  |
| MJ_RS04330 | 103.9  | 31.4     | 114.2    | 52.4    | 68.6     | 45.7     | 68.8     | 119.6  | 149.3   | 134.4     | 107.5  | 154.6   | 89.1     | -1.06 |
| MJ_RS04380 | 51.9   | 62.7     | 114.2    | 96.0    | 92.9     | 91.3     | 88.7     | 199.8  | 183.4   | 216.9     | 150.7  | 197.4   | 223.1    | -1.10 |

|            |        |          |          |         |          |          |          |        |         |          |        |         |         |       |
|------------|--------|----------|----------|---------|----------|----------|----------|--------|---------|----------|--------|---------|---------|-------|
| MJ_RS09325 | 51.9   | 62.7     | 114.2    | 202.7   | 255.4    | 195.1    | 150.9    | 39.4   | 26.6    | 27.9     | 52.7   | 78.3    | 105.3   | 1.62  |
| MJ_RS04390 | 155.8  | 156.8    | 304.5    | 477.1   | 487.6    | 399.4    | 290.9    | 35.6   | 12.8    | 12.6     | 69.4   | 73.7    | 99.7    | 2.75  |
| MJ_RS09330 | 259.7  | 282.2    | 190.3    | 547.9   | 496.1    | 364.6    | 279.3    | 39.8   | 6.7     | 7.3      | 92.5   | 65.1    | 69.9    | 2.92  |
| MJ_RS04395 | 16255  | 155999.1 | 155840.9 | 228882. | 165805.8 | 177880.8 | 175952.6 | 79914. | 91522.2 | 104158.4 | 10343  | 88903.7 | 50627.1 | 1.02  |
|            | 8.3    |          |          | 6       |          |          |          | 0      |         |          | 3.0    |         |         |       |
| MJ_RS04410 | 103.9  | 125.4    | 152.3    | 484.9   | 345.1    | 245.8    | 233.8    | 1280.3 | 1194.5  | 865.1    | 846.7  | 964.3   | 712.3   | -1.81 |
| MJ_RS04460 | 207.7  | 188.1    | 380.7    | 535.3   | 563.6    | 577.1    | 641.6    | 231.4  | 259.5   | 198.8    | 202.5  | 273.7   | 264.8   | 1.06  |
| MJ_RS04485 | 727.1  | 1473.8   | 1408.4   | 345.3   | 505.6    | 214.2    | 245.4    | 242.7  | 240.2   | 267.1    | 186.3  | 243.3   | 290.8   | 1.43  |
| MJ_RS04500 | 415.5  | 439.0    | 456.8    | 315.2   | 491.9    | 399.4    | 424.4    | 205.3  | 65.5    | 74.0     | 147.1  | 193.1   | 347.9   | 1.28  |
| MJ_RS04625 | 3531.6 | 2100.9   | 1522.6   | 2037.6  | 1068.1   | 2156.6   | 1864.2   | 9894.2 | 9868.2  | 7923.4   | 7198.4 | 7713.3  | 4057.1  | -1.96 |
| MJ_RS04630 | 1506.1 | 1034.8   | 1370.4   | 1061.9  | 516.1    | 1148.5   | 1038.6   | 5747.4 | 5634.4  | 4020.7   | 3889.7 | 4361.5  | 2327.2  | -2.03 |
| MJ_RS04660 | 882.9  | 627.1    | 571.0    | 219.2   | 210.0    | 164.4    | 152.5    | 585.4  | 707.3   | 715.3    | 1161.9 | 737.0   | 770.7   | -1.16 |
| MJ_RS04860 | 51.9   | 31.4     | 38.1     | 52.4    | 78.1     | 88.0     | 81.2     | 40.1   | 38.6    | 31.6     | 28.0   | 33.5    | 31.2    | 1.09  |
| MJ_RS04940 | 259.7  | 313.6    | 380.7    | 257.0   | 255.4    | 372.9    | 335.7    | 985.4  | 1257.6  | 1338.0   | 1087.8 | 904.9   | 434.0   | -1.70 |
| MJ_RS04965 | 467.4  | 1222.9   | 1370.4   | 1389.7  | 1361.6   | 1285.5   | 1322.1   | 287.5  | 354.1   | 265.7    | 304.2  | 371.7   | 326.0   | 1.99  |
| MJ_RS04970 | 571.3  | 1379.7   | 1218.1   | 1263.7  | 1432.3   | 1426.6   | 1183.7   | 380.8  | 409.9   | 399.9    | 285.4  | 447.2   | 294.7   | 1.76  |
| MJ_RS04990 | 3479.7 | 2445.8   | 2055.5   | 1772.8  | 2782.2   | 2688.0   | 2318.5   | 6041.4 | 8897.9  | 10565.3  | 3757.7 | 3790.9  | 2271.0  | -1.24 |
| MJ_RS04995 | 0.0    | 0.0      | 0.0      | 9.7     | 5.3      | 3.3      | 5.0      | 10.8   | 27.4    | 32.1     | 13.8   | 16.7    | 16.1    | -1.71 |
| MJ_RS05035 | 259.7  | 407.6    | 494.9    | 387.0   | 608.0    | 394.4    | 346.5    | 182.4  | 59.5    | 59.5     | 211.8  | 204.5   | 303.2   | 1.30  |
| MJ_RS05040 | 103.9  | 125.4    | 152.3    | 171.7   | 225.9    | 212.6    | 225.5    | 51.6   | 23.1    | 19.2     | 71.7   | 65.3    | 127.6   | 1.64  |
| MJ_RS05080 | 51.9   | 188.1    | 152.3    | 144.5   | 80.2     | 88.9     | 67.1     | 19.2   | 24.3    | 23.6     | 29.7   | 24.7    | 31.1    | 1.98  |
| MJ_RS05085 | 467.4  | 344.9    | 152.3    | 217.2   | 288.1    | 330.5    | 279.3    | 523.6  | 628.8   | 570.1    | 450.7  | 729.3   | 528.2   | -1.01 |
| MJ_RS05135 | 519.4  | 282.2    | 152.3    | 406.4   | 391.6    | 385.3    | 366.4    | 715.9  | 988.4   | 1026.3   | 406.7  | 887.3   | 648.7   | -1.08 |
| MJ_RS05165 | 51.9   | 188.1    | 114.2    | 104.7   | 100.3    | 103.0    | 103.6    | 234.9  | 190.7   | 218.0    | 198.9  | 207.7   | 231.4   | -1.04 |
| MJ_RS05170 | 467.4  | 439.0    | 609.1    | 406.4   | 277.6    | 460.0    | 374.7    | 1312.7 | 1037.5  | 1297.9   | 1125.1 | 957.1   | 857.9   | -1.44 |
| MJ_RS05175 | 571.3  | 564.4    | 571.0    | 617.8   | 657.6    | 590.4    | 564.5    | 1285.6 | 1662.0  | 1828.4   | 774.4  | 988.6   | 731.3   | -1.02 |
| MJ_RS05225 | 103.9  | 94.1     | 190.3    | 253.1   | 63.3     | 176.9    | 132.6    | 466.6  | 301.1   | 275.1    | 373.1  | 308.9   | 271.3   | -1.14 |
| MJ_RS05325 | 0.0    | 94.1     | 114.2    | 38.8    | 42.2     | 44.0     | 40.6     | 89.5   | 102.9   | 123.4    | 99.4   | 109.8   | 151.2   | -1.37 |
| MJ_RS05365 | 363.5  | 501.7    | 723.2    | 676.9   | 451.7    | 485.0    | 756.0    | 406.6  | 270.3   | 231.8    | 250.9  | 225.1   | 194.6   | 1.13  |
| MJ_RS05375 | 51.9   | 94.1     | 38.1     | 38.8    | 40.1     | 36.5     | 35.6     | 79.5   | 88.3    | 101.5    | 87.6   | 61.6    | 84.9    | -1.10 |
| MJ_RS05415 | 363.5  | 344.9    | 342.6    | 334.6   | 219.5    | 326.4    | 234.6    | 671.9  | 633.5   | 745.0    | 698.0  | 647.4   | 469.4   | -1.15 |
| MJ_RS05455 | 2025.5 | 1912.8   | 1560.7   | 4053.8  | 1942.1   | 3820.7   | 4034.3   | 1438.0 | 1759.2  | 2296.7   | 932.2  | 1251.9  | 689.8   | 1.01  |
| MJ_RS05470 | 207.7  | 250.9    | 228.4    | 208.5   | 176.3    | 181.0    | 177.4    | 402.1  | 326.1   | 414.3    | 414.5  | 353.9   | 379.6   | -1.01 |
| MJ_RS05490 | 779.0  | 1034.8   | 456.8    | 659.5   | 632.2    | 662.7    | 621.7    | 1427.7 | 1389.5  | 1545.3   | 1369.3 | 1401.3  | 1755.6  | -1.15 |
| MJ_RS05495 | 0.0    | 62.7     | 0.0      | 9.7     | 13.7     | 11.6     | 10.8     | 46.3   | 33.3    | 28.6     | 39.2   | 42.5    | 64.3    | -1.82 |
| MJ_RS05520 | 727.1  | 407.6    | 571.0    | 862.2   | 689.2    | 724.9    | 891.9    | 372.4  | 229.9   | 202.5    | 424.4  | 400.6   | 388.2   | 1.10  |
| MJ_RS05525 | 103.9  | 94.1     | 38.1     | 232.8   | 190.0    | 239.2    | 273.5    | 79.2   | 55.2    | 41.9     | 71.5   | 80.0    | 90.0    | 1.52  |
| MJ_RS05530 | 207.7  | 62.7     | 152.3    | 86.3    | 78.1     | 98.8     | 110.2    | 38.7   | 25.4    | 22.9     | 30.6   | 46.1    | 69.7    | 1.35  |
| MJ_RS05550 | 467.4  | 940.7    | 837.4    | 325.9   | 350.4    | 238.3    | 223.0    | 78.4   | 75.1    | 71.5     | 171.4  | 251.0   | 238.1   | 1.62  |
| MJ_RS05555 | 13295. | 14392.7  | 14807.6  | 9795.1  | 11398.1  | 10263.1  | 11114.8  | 1030.1 | 1328.6  | 1369.2   | 4407.8 | 5851.4  | 2921.2  | 2.11  |
|            | 5      |          |          |         |          |          |          |        |         |          |        |         |         |       |
| MJ_RS09345 | 0.0    | 0.0      | 38.1     | 11.6    | 17.9     | 18.3     | 14.9     | 53.9   | 53.2    | 54.3     | 45.9   | 54.4    | 73.7    | -1.84 |
| MJ_RS05720 | 207.7  | 125.4    | 228.4    | 105.7   | 140.4    | 142.8    | 144.2    | 305.5  | 281.0   | 286.5    | 247.3  | 363.9   | 380.2   | -1.17 |
| MJ_RS05870 | 311.6  | 501.7    | 532.9    | 385.0   | 395.8    | 427.7    | 460.9    | 818.1  | 972.7   | 1152.7   | 883.2  | 839.4   | 684.4   | -1.07 |
| MJ_RS05885 | 103.9  | 125.4    | 114.2    | 135.8   | 103.4    | 172.7    | 126.0    | 468.1  | 404.6   | 556.8    | 461.9  | 338.8   | 299.5   | -1.67 |
| MJ_RS05900 | 779.0  | 972.1    | 875.5    | 627.5   | 724.1    | 445.9    | 416.9    | 325.0  | 372.3   | 311.9    | 255.1  | 394.0   | 268.1   | 1.01  |
| MJ_RS05930 | 103.9  | 376.3    | 114.2    | 170.7   | 135.1    | 176.0    | 157.5    | 720.3  | 524.5   | 579.7    | 691.5  | 552.9   | 585.1   | -1.88 |
| MJ_RS05940 | 415.5  | 752.6    | 951.6    | 991.1   | 907.7    | 976.6    | 1090.8   | 342.5  | 267.2   | 245.1    | 316.3  | 317.4   | 327.1   | 1.61  |
| MJ_RS05975 | 155.8  | 188.1    | 114.2    | 168.7   | 191.0    | 121.2    | 158.3    | 436.8  | 359.1   | 335.8    | 369.7  | 330.2   | 302.0   | -1.16 |
| MJ_RS05995 | 103.9  | 31.4     | 38.1     | 33.0    | 17.9     | 38.2     | 40.6     | 125.1  | 108.1   | 124.1    | 98.0   | 103.2   | 94.2    | -1.69 |

|            |         |         |         |         |         |         |         |         |         |         |         |         |        |       |
|------------|---------|---------|---------|---------|---------|---------|---------|---------|---------|---------|---------|---------|--------|-------|
| MJ_RS06000 | 51.9    | 0.0     | 0.0     | 22.3    | 8.4     | 26.6    | 22.4    | 56.3    | 51.9    | 69.4    | 54.4    | 49.9    | 49.5   | -1.47 |
| MJ_RS06110 | 207.7   | 188.1   | 418.7   | 268.6   | 194.2   | 191.8   | 195.6   | 86.7    | 73.9    | 45.8    | 66.7    | 115.6   | 124.9  | 1.39  |
| MJ_RS06125 | 51.9    | 156.8   | 38.1    | 143.5   | 157.3   | 126.2   | 112.7   | 295.1   | 240.4   | 301.6   | 281.2   | 261.2   | 319.4  | -1.12 |
| MJ_RS06135 | 311.6   | 62.7    | 76.1    | 105.7   | 134.0   | 144.5   | 160.8   | 346.9   | 306.8   | 419.4   | 361.1   | 286.6   | 316.8  | -1.32 |
| MJ_RS06170 | 103.9   | 0.0     | 38.1    | 52.4    | 79.2    | 44.8    | 48.1    | 22.0    | 13.8    | 9.2     | 18.5    | 24.9    | 36.0   | 1.38  |
| MJ_RS06180 | 9504.2  | 12103.6 | 10886.8 | 11244.0 | 10067.1 | 8592.3  | 8987.0  | 3958.4  | 6065.1  | 5130.6  | 4564.1  | 4539.5  | 2796.1 | 1.18  |
| MJ_RS06185 | 779.0   | 721.2   | 532.9   | 644.9   | 559.4   | 614.5   | 557.9   | 212.2   | 350.4   | 240.0   | 263.3   | 297.9   | 198.6  | 1.23  |
| MJ_RS06205 | 3375.8  | 3386.5  | 2360.1  | 1445.0  | 2076.1  | 2122.5  | 2236.4  | 464.9   | 290.8   | 346.3   | 790.1   | 674.5   | 787.4  | 2.10  |
| MJ_RS06210 | 415.5   | 313.6   | 266.5   | 239.5   | 308.2   | 338.8   | 257.0   | 134.7   | 78.7    | 68.3    | 151.0   | 197.3   | 257.2  | 1.00  |
| MJ_RS06230 | 2856.5  | 2038.2  | 2245.9  | 2284.9  | 1955.8  | 2186.5  | 2130.3  | 5651.5  | 6118.5  | 6142.4  | 3740.0  | 4562.0  | 1669.6 | -1.06 |
| MJ_RS06265 | 571.3   | 156.8   | 76.1    | 187.2   | 218.5   | 300.6   | 308.4   | 514.3   | 709.4   | 765.7   | 462.2   | 661.1   | 413.6  | -1.22 |
| MJ_RS06325 | 882.9   | 1285.6  | 989.7   | 1004.7  | 955.2   | 897.7   | 853.8   | 298.0   | 378.8   | 377.7   | 323.8   | 420.8   | 410.0  | 1.38  |
| MJ_RS06330 | 311.6   | 31.4    | 152.3   | 112.5   | 96.0    | 89.7    | 64.7    | 714.2   | 579.7   | 643.1   | 616.0   | 663.6   | 471.9  | -2.67 |
| MJ_RS06355 | 9452.3  | 7494.2  | 7575.1  | 7591.7  | 7293.3  | 7600.8  | 7451.9  | 13062.4 | 26008.8 | 29556.8 | 12393.4 | 14148.1 | 8422.2 | -1.15 |
| MJ_RS06390 | 51.9    | 62.7    | 0.0     | 17.5    | 32.7    | 20.8    | 24.9    | 78.3    | 51.9    | 60.9    | 92.7    | 97.6    | 236.8  | -2.03 |
| MJ_RS06395 | 467.4   | 344.9   | 418.7   | 361.7   | 312.4   | 318.0   | 326.6   | 676.5   | 527.6   | 656.2   | 807.7   | 530.1   | 1068.5 | -1.05 |
| MJ_RS06445 | 0.0     | 470.3   | 304.5   | 44.6    | 32.7    | 8.3     | 16.6    | 3.2     | 5.5     | 4.1     | 5.3     | 4.1     | 7.3    | 4.52  |
| MJ_RS06450 | 155.8   | 1630.5  | 1751.0  | 450.0   | 432.7   | 83.0    | 104.4   | 30.1    | 66.1    | 71.5    | 36.1    | 30.9    | 35.0   | 3.84  |
| MJ_RS06455 | 675.2   | 972.1   | 1522.6  | 414.1   | 785.3   | 270.7   | 321.6   | 206.4   | 17.4    | 14.4    | 103.9   | 105.2   | 114.0  | 2.90  |
| MJ_RS06520 | 0.0     | 0.0     | 0.0     | 3.9     | 2.1     | 6.6     | 4.1     | 14.8    | 13.6    | 18.1    | 16.6    | 18.6    | 27.1   | -2.00 |
| MJ_RS06525 | 0.0     | 62.7    | 114.2   | 27.2    | 15.8    | 31.6    | 36.5    | 115.3   | 103.5   | 110.4   | 94.2    | 103.3   | 142.0  | -1.89 |
| MJ_RS06550 | 0.0     | 0.0     | 76.1    | 47.5    | 28.5    | 49.8    | 47.2    | 90.6    | 73.7    | 90.9    | 88.8    | 76.8    | 122.9  | -1.10 |
| MJ_RS06575 | 727.1   | 1034.8  | 1370.4  | 1096.9  | 1481.9  | 1003.1  | 1118.2  | 556.9   | 699.2   | 656.6   | 478.1   | 570.2   | 314.4  | 1.06  |
| MJ_RS06580 | 51.9    | 62.7    | 76.1    | 69.8    | 119.3   | 85.5    | 96.2    | 51.0    | 53.0    | 44.7    | 38.1    | 47.9    | 27.1   | 1.04  |
| MJ_RS06605 | 1298.4  | 1191.6  | 1408.4  | 1298.6  | 1300.3  | 1042.2  | 1097.5  | 461.9   | 755.4   | 704.3   | 460.4   | 546.9   | 454.3  | 1.11  |
| MJ_RS06640 | 363.5   | 501.7   | 380.7   | 353.0   | 288.1   | 307.3   | 333.2   | 1060.8  | 832.5   | 711.4   | 1123.1  | 885.1   | 856.1  | -1.44 |
| MJ_RS06650 | 155.8   | 156.8   | 152.3   | 130.9   | 141.4   | 166.9   | 150.0   | 329.5   | 344.1   | 368.7   | 408.6   | 306.9   | 242.6  | -1.17 |
| MJ_RS06665 | 363.5   | 501.7   | 380.7   | 141.6   | 116.1   | 70.6    | 91.2    | 39.5    | 9.1     | 9.8     | 30.9    | 33.5    | 27.2   | 3.03  |
| MJ_RS06670 | 51.9    | 282.2   | 190.3   | 94.1    | 116.1   | 110.4   | 72.9    | 292.0   | 365.8   | 450.7   | 298.8   | 201.7   | 307.6  | -1.52 |
| MJ_RS06675 | 0.0     | 31.4    | 152.3   | 15.5    | 27.4    | 28.2    | 17.4    | 95.0    | 104.7   | 93.2    | 82.0    | 80.0    | 254.9  | -2.17 |
| MJ_RS06685 | 207.7   | 125.4   | 38.1    | 46.6    | 46.4    | 49.8    | 35.6    | 121.5   | 74.5    | 97.8    | 97.2    | 104.9   | 143.2  | -1.01 |
| MJ_RS06840 | 882.9   | 940.7   | 571.0   | 713.8   | 612.2   | 633.6   | 689.7   | 177.9   | 116.7   | 146.8   | 471.4   | 442.0   | 562.5  | 1.15  |
| MJ_RS06845 | 779.0   | 940.7   | 799.4   | 844.7   | 565.7   | 875.3   | 965.7   | 57.6    | 82.6    | 103.5   | 198.0   | 290.9   | 208.1  | 2.39  |
| MJ_RS06850 | 17086.8 | 15960.5 | 15683.1 | 11763.8 | 9877.1  | 12633.9 | 13483.9 | 735.3   | 1113.6  | 1281.0  | 2155.6  | 2642.0  | 1627.8 | 3.11  |
| MJ_RS09360 | 415.5   | 689.8   | 456.8   | 400.5   | 387.4   | 634.4   | 718.7   | 149.7   | 190.1   | 163.8   | 144.0   | 250.4   | 196.6  | 1.55  |
| MJ_RS06855 | 1454.2  | 1818.7  | 1560.7  | 1395.6  | 1457.6  | 1515.5  | 1818.6  | 261.7   | 321.0   | 381.3   | 410.7   | 571.1   | 415.6  | 2.00  |
| MJ_RS06860 | 207.7   | 376.3   | 456.8   | 354.0   | 312.4   | 282.3   | 347.3   | 123.1   | 135.5   | 149.1   | 135.8   | 188.8   | 198.6  | 1.09  |
| MJ_RS06995 | 51.9    | 31.4    | 38.1    | 37.8    | 51.7    | 61.5    | 42.3    | 117.2   | 140.4   | 140.9   | 242.5   | 129.3   | 118.1  | -1.63 |
| MJ_RS07000 | 51.9    | 219.5   | 76.1    | 92.1    | 104.5   | 91.3    | 62.2    | 157.4   | 160.1   | 147.5   | 578.1   | 192.2   | 205.9  | -1.35 |
| MJ_RS07045 | 311.6   | 313.6   | 494.9   | 450.0   | 561.5   | 394.4   | 404.5   | 180.5   | 199.9   | 235.7   | 202.8   | 204.0   | 222.5  | 1.08  |
| MJ_RS07180 | 51.9    | 0.0     | 0.0     | 37.8    | 29.6    | 29.9    | 24.9    | 70.6    | 77.1    | 100.8   | 74.8    | 83.5    | 84.5   | -1.46 |
| MJ_RS07190 | 103.9   | 94.1    | 114.2   | 174.6   | 149.9   | 202.6   | 155.0   | 469.3   | 592.5   | 550.6   | 324.4   | 442.3   | 334.8  | -1.49 |
| MJ_RS07195 | 2129.4  | 1787.3  | 1598.8  | 2075.4  | 1181.1  | 1787.0  | 1356.1  | 7276.0  | 6673.5  | 7454.4  | 4105.1  | 4356.9  | 2739.1 | -1.69 |
| MJ_RS07230 | 103.9   | 188.1   | 114.2   | 122.2   | 122.4   | 112.1   | 97.0    | 236.8   | 251.2   | 342.9   | 233.8   | 238.1   | 303.7  | -1.21 |
| MJ_RS07245 | 0.0     | 0.0     | 0.0     | 2.9     | 3.2     | 5.8     | 3.3     | 22.5    | 18.1    | 21.5    | 16.5    | 21.3    | 39.5   | -2.49 |
| MJ_RS07270 | 1402.3  | 1505.1  | 1332.3  | 1626.4  | 1319.3  | 1655.8  | 1553.4  | 554.2   | 916.1   | 790.6   | 564.4   | 631.2   | 392.8  | 1.22  |
| MJ_RS07275 | 207.7   | 533.1   | 266.5   | 563.5   | 456.0   | 513.2   | 485.7   | 214.4   | 233.7   | 161.7   | 173.9   | 238.4   | 143.2  | 1.27  |
| MJ_RS07310 | 207.7   | 407.6   | 456.8   | 277.4   | 239.6   | 244.1   | 265.3   | 641.2   | 533.2   | 642.4   | 698.8   | 527.7   | 773.9  | -1.22 |



|            |        |        |        |        |        |        |        |        |        |        |        |        |        |       |
|------------|--------|--------|--------|--------|--------|--------|--------|--------|--------|--------|--------|--------|--------|-------|
| MJ_RS07315 | 103.9  | 62.7   | 114.2  | 33.0   | 31.7   | 39.0   | 31.5   | 162.0  | 83.8   | 87.9   | 145.0  | 113.9  | 221.1  | -1.77 |
| MJ_RS07430 | 0.0    | 31.4   | 38.1   | 57.2   | 73.9   | 94.7   | 87.0   | 23.8   | 16.2   | 10.8   | 23.6   | 25.5   | 28.0   | 1.73  |
| MJ_RS07495 | 51.9   | 0.0    | 0.0    | 65.0   | 50.7   | 97.2   | 89.5   | 95.8   | 161.5  | 165.1  | 97.8   | 112.4  | 249.4  | -1.15 |
| MJ_RS07595 | 571.3  | 439.0  | 494.9  | 324.9  | 335.6  | 201.8  | 194.8  | 787.4  | 567.9  | 309.2  | 691.6  | 935.8  | 739.5  | -1.04 |
| MJ_RS07715 | 4518.4 | 3543.3 | 4073.0 | 1091.0 | 782.1  | 1638.4 | 1821.1 | 332.9  | 687.7  | 868.0  | 608.3  | 907.2  | 597.0  | 1.87  |
| MJ_RS07720 | 3220.0 | 2383.1 | 2626.5 | 1120.1 | 1088.2 | 1795.4 | 2003.5 | 275.0  | 393.0  | 454.2  | 400.5  | 563.0  | 490.7  | 2.20  |
| MJ_RS07750 | 103.9  | 62.7   | 152.3  | 185.2  | 152.0  | 176.9  | 219.7  | 81.8   | 88.7   | 72.1   | 64.7   | 72.8   | 66.6   | 1.22  |
| MJ_RS07770 | 207.7  | 439.0  | 685.2  | 322.0  | 368.4  | 391.1  | 379.6  | 185.6  | 143.7  | 123.2  | 145.0  | 185.5  | 148.8  | 1.30  |
| MJ_RS07775 | 207.7  | 156.8  | 532.9  | 391.8  | 371.5  | 343.8  | 329.1  | 211.4  | 140.6  | 109.7  | 137.8  | 186.7  | 177.8  | 1.11  |
| MJ_RS07780 | 4206.8 | 4578.1 | 6090.5 | 5366.9 | 5714.3 | 4046.6 | 4079.9 | 1246.0 | 1422.2 | 951.4  | 910.3  | 995.3  | 773.1  | 2.21  |
| MJ_RS07785 | 155.8  | 156.8  | 304.5  | 139.7  | 149.9  | 142.0  | 103.6  | 350.7  | 248.8  | 320.0  | 318.7  | 229.7  | 258.0  | -1.02 |
| MJ_RS07835 | 986.8  | 564.4  | 685.2  | 579.9  | 573.1  | 425.2  | 362.2  | 1519.6 | 1287.2 | 1289.5 | 1149.8 | 1378.6 | 1253.7 | -1.28 |
| MJ_RS07940 | 727.1  | 2822.1 | 2664.6 | 989.2  | 1260.2 | 723.3  | 745.2  | 453.3  | 411.5  | 351.3  | 321.8  | 706.6  | 556.0  | 1.57  |
| MJ_RS07970 | 986.8  | 846.6  | 837.4  | 758.4  | 451.7  | 801.3  | 689.7  | 176.3  | 110.4  | 117.3  | 295.8  | 268.1  | 196.6  | 1.94  |
| MJ_RS07975 | 103.9  | 407.6  | 456.8  | 264.8  | 259.6  | 235.0  | 230.4  | 110.1  | 53.4   | 52.2   | 109.5  | 127.7  | 177.6  | 1.37  |
| MJ_RS08040 | 259.7  | 282.2  | 266.5  | 390.8  | 487.6  | 380.3  | 373.0  | 147.7  | 109.8  | 96.4   | 123.5  | 116.4  | 119.6  | 1.69  |
| MJ_RS08070 | 51.9   | 344.9  | 342.6  | 230.8  | 325.1  | 260.7  | 248.7  | 30.9   | 118.3  | 193.8  | 22.6   | 57.6   | 41.0   | 1.77  |
| MJ_RS08085 | 0.0    | 0.0    | 0.0    | 10.7   | 4.2    | 11.6   | 9.9    | 28.3   | 27.8   | 20.4   | 120.5  | 14.1   | 44.8   | -2.26 |
| MJ_RS08090 | 0.0    | 62.7   | 38.1   | 15.5   | 20.1   | 44.0   | 29.0   | 73.2   | 102.3  | 77.2   | 320.7  | 45.3   | 118.0  | -2.11 |
| MJ_RS08095 | 51.9   | 31.4   | 0.0    | 11.6   | 10.6   | 21.6   | 16.6   | 42.8   | 82.2   | 74.4   | 162.1  | 37.6   | 77.1   | -2.32 |
| MJ_RS08110 | 0.0    | 0.0    | 38.1   | 8.7    | 6.3    | 11.6   | 5.8    | 22.9   | 32.5   | 31.4   | 66.3   | 22.1   | 31.4   | -2.01 |
| MJ_RS08115 | 0.0    | 0.0    | 0.0    | 11.6   | 9.5    | 21.6   | 20.7   | 48.3   | 59.9   | 43.3   | 108.9  | 28.2   | 43.6   | -1.90 |
| MJ_RS08130 | 103.9  | 188.1  | 114.2  | 139.7  | 112.9  | 102.1  | 117.7  | 300.9  | 208.6  | 299.3  | 383.8  | 299.4  | 379.0  | -1.37 |
| MJ_RS08135 | 103.9  | 62.7   | 38.1   | 61.1   | 81.3   | 68.1   | 49.7   | 231.4  | 177.9  | 197.2  | 167.0  | 208.5  | 180.2  | -1.58 |
| MJ_RS08140 | 0.0    | 0.0    | 76.1   | 26.2   | 26.4   | 27.4   | 19.1   | 70.3   | 43.4   | 45.3   | 76.1   | 71.5   | 136.0  | -1.57 |
| MJ_RS08175 | 0.0    | 62.7   | 76.1   | 49.5   | 52.8   | 49.8   | 45.6   | 32.1   | 14.4   | 12.6   | 26.0   | 29.5   | 28.7   | 1.05  |
| MJ_RS08240 | 1610.0 | 689.8  | 609.1  | 907.7  | 1106.1 | 854.5  | 792.4  | 2320.2 | 2354.8 | 2807.5 | 2235.9 | 1452.4 | 1047.5 | -1.14 |
| MJ_RS08245 | 103.9  | 31.4   | 152.3  | 42.7   | 31.7   | 26.6   | 19.1   | 100.8  | 69.2   | 68.3   | 93.3   | 87.7   | 149.6  | -1.36 |
| MJ_RS08275 | 0.0    | 62.7   | 38.1   | 12.6   | 9.5    | 13.3   | 15.7   | 38.1   | 39.2   | 34.1   | 29.1   | 25.9   | 25.9   | -1.19 |
| MJ_RS08280 | 0.0    | 31.4   | 38.1   | 15.5   | 24.3   | 19.9   | 17.4   | 64.4   | 61.3   | 51.5   | 42.9   | 43.3   | 50.7   | -1.43 |
| MJ_RS09390 | 103.9  | 0.0    | 0.0    | 27.2   | 28.5   | 34.0   | 37.3   | 73.0   | 87.5   | 68.0   | 53.7   | 52.0   | 57.1   | -1.04 |
| MJ_RS08285 | 51.9   | 125.4  | 114.2  | 98.9   | 85.5   | 106.3  | 98.6   | 200.7  | 298.5  | 251.7  | 161.4  | 185.6  | 191.6  | -1.13 |
| MJ_RS08290 | 0.0    | 62.7   | 38.1   | 31.0   | 31.7   | 20.8   | 28.2   | 120.5  | 88.9   | 77.6   | 76.8   | 111.3  | 134.4  | -1.85 |
| MJ_RS08340 | 207.7  | 125.4  | 418.7  | 93.1   | 87.6   | 49.8   | 39.8   | 531.3  | 668.2  | 787.4  | 428.9  | 71.9   | 285.6  | -1.87 |
| MJ_RS08425 | 155.8  | 31.4   | 152.3  | 143.5  | 114.0  | 125.4  | 146.7  | 54.1   | 68.2   | 49.0   | 45.6   | 47.0   | 52.8   | 1.30  |
| MJ_RS08540 | 986.8  | 1097.5 | 951.6  | 825.3  | 1125.1 | 701.7  | 620.0  | 347.9  | 549.7  | 493.8  | 290.8  | 326.4  | 319.6  | 1.18  |
| MJ_RS08545 | 779.0  | 533.1  | 723.2  | 890.3  | 770.5  | 856.2  | 825.6  | 269.8  | 345.3  | 299.3  | 249.2  | 297.2  | 291.1  | 1.46  |
| MJ_RS08550 | 779.0  | 564.4  | 875.5  | 1014.4 | 857.0  | 745.7  | 794.1  | 305.6  | 347.0  | 232.0  | 275.4  | 297.2  | 245.6  | 1.54  |
| MJ_RS08585 | 467.4  | 470.3  | 571.0  | 599.3  | 485.5  | 637.8  | 661.5  | 257.4  | 299.5  | 331.0  | 275.4  | 260.1  | 205.8  | 1.09  |
| MJ_RS08590 | 415.5  | 344.9  | 532.9  | 656.6  | 581.6  | 686.8  | 712.9  | 316.0  | 271.9  | 257.7  | 300.9  | 344.5  | 277.6  | 1.05  |
| MJ_RS08680 | 0.0    | 94.1   | 38.1   | 25.2   | 29.6   | 43.2   | 54.7   | 24.7   | 6.1    | 5.7    | 17.1   | 18.6   | 21.1   | 1.35  |
| MJ_RS08725 | 0.0    | 62.7   | 38.1   | 23.3   | 20.1   | 21.6   | 16.6   | 255.1  | 157.5  | 170.2  | 141.8  | 193.0  | 160.1  | -3.09 |
| MJ_RS08730 | 51.9   | 62.7   | 38.1   | 67.9   | 58.1   | 65.6   | 48.9   | 327.5  | 175.5  | 177.5  | 212.9  | 275.1  | 279.2  | -2.02 |
| MJ_RS08785 | 103.9  | 0.0    | 114.2  | 59.2   | 49.6   | 48.2   | 59.7   | 146.6  | 83.2   | 116.6  | 128.9  | 124.5  | 116.4  | -1.12 |
| MJ_RS08900 | 259.7  | 188.1  | 266.5  | 64.0   | 50.7   | 37.4   | 41.4   | 208.5  | 227.3  | 235.9  | 188.3  | 273.4  | 268.6  | -1.41 |
| MJ_RS08995 | 0.0    | 156.8  | 190.3  | 116.4  | 128.8  | 128.7  | 116.0  | 44.3   | 40.4   | 43.1   | 43.5   | 47.4   | 49.6   | 1.45  |
| MJ_RS09015 | 0.0    | 0.0    | 76.1   | 13.6   | 8.4    | 27.4   | 21.6   | 6.1    | 4.9    | 3.9    | 7.5    | 8.4    | 9.2    | 1.46  |
| MJ_RS09020 | 103.9  | 31.4   | 38.1   | 147.4  | 126.7  | 168.6  | 122.7  | 43.7   | 31.2   | 29.1   | 60.8   | 50.8   | 60.1   | 1.46  |
| MJ_RS09025 | 0.0    | 31.4   | 190.3  | 191.1  | 127.7  | 132.0  | 131.0  | 60.6   | 43.0   | 36.2   | 71.7   | 61.9   | 65.7   | 1.25  |
| MJ_RS09030 | 0.0    | 62.7   | 0.0    | 69.8   | 74.9   | 57.3   | 71.3   | 11.9   | 13.6   | 11.9   | 13.5   | 15.8   | 16.0   | 2.21  |

|            |       |       |       |       |       |       |       |       |       |       |       |       |       |      |
|------------|-------|-------|-------|-------|-------|-------|-------|-------|-------|-------|-------|-------|-------|------|
| MJ_RS09035 | 0.0   | 0.0   | 114.2 | 18.4  | 33.8  | 29.9  | 26.5  | 7.2   | 4.3   | 5.0   | 9.6   | 8.8   | 13.6  | 1.79 |
| MJ_RS09040 | 0.0   | 0.0   | 38.1  | 8.7   | 9.5   | 8.3   | 11.6  | 3.1   | 1.2   | 2.5   | 3.4   | 4.0   | 4.0   | 1.68 |
| MJ_RS09415 | 51.9  | 125.4 | 0.0   | 65.0  | 50.7  | 94.7  | 95.3  | 16.2  | 37.3  | 54.3  | 31.6  | 29.6  | 24.2  | 1.22 |
| MJ_RS09235 | 571.3 | 407.6 | 609.1 | 540.2 | 487.6 | 893.5 | 940.8 | 260.9 | 216.1 | 217.8 | 225.0 | 289.7 | 309.9 | 1.39 |
| MJ_RS09240 | 51.9  | 0.0   | 152.3 | 193.0 | 130.9 | 355.4 | 410.3 | 78.6  | 66.6  | 87.0  | 78.5  | 76.3  | 98.6  | 1.41 |
